# Supplementary material
Source: PubMed Central journal article supplement (PMC9389433)
Supplement: jamaophthalmol-e223131-s001.pdf [file jamaophthalmol-e223131-s001.pdf]

## Supplemental Online Content

Marcus DM, Silva PS, Liu D, et al; DRCR Retina Network. Association of predominantly peripheral lesions on ultra-widefield imaging and the risk of diabetic retinopathy worsening over time. *JAMA Ophthalmol*. Published online August 18, 2022. doi:10.1001/jamaophthalmol.2022.3131

**eFigure 1.** Cumulative proportion of disease worsening (DRSS worsening by 2 or more steps within the ETDRS fields on masked UWF-color images or receipt of DR treatment) through 4 years by baseline DRSS level on standard ETDRS fundus photographs

**eFigure 2.** Stratified Analyses of Primary Outcome: DRSS worsening by 2 or more steps within the ETDRS fields on masked UWF-color images or receipt of DR treatment through 4 years by baseline DRSS level on UWF-color and color-PPL

**eFigure 3.** Stratified Analyses of Primary Outcome: DRSS worsening by 2 or more steps within the ETDRS fields on masked UWF-color images or receipt of DR treatment through 4 years by baseline DRSS level on UWF-color and FA-PPL

**eTable 1.** Visit Completion Over 4 Years

**eTable 2.** Baseline Characteristics by Baseline PPL Status

**eTable 3.** Baseline Characteristics by 4-Year Visit Completion

**eTable 4.** Comparison of Baseline PPL on UWF-Color and UWF-FA Images

**eTable 5.** Treatment Initiation During Follow-up by Baseline DRSS Level

**eTable 6.** Initial event for eyes meeting the primary outcome

**eTable 7.** Sensitivity Analyses of Primary Outcome: DRSS worsening by 2 or more steps within the ETDRS fields on masked UWF-color images or receipt of DR treatment through 4 years by Color-PPL

**eTable 8.** Sensitivity Analyses of Primary Outcome: DRSS worsening by 2 or more steps within the ETDRS fields on masked UWF-color images or receipt of DR treatment through 4 years by FA-PPL

**eTable 9.** Receipt of Treatment for Non-DR Conditions or Lost to Follow-up by Baseline Characteristics

**eTable 10.** Primary Outcome: DR worsening by 2 or more steps within the ETDRS fields on UWF-color images or receipt of DR treatment through 4 years by baseline DRSS level and PPL characteristics

**eTable 11.** Secondary Outcome: Development of PDR within the ETDRS fields on masked UWF-color images or receipt of DR treatment through 4 years by baseline DRSS level and PPL characteristics

**eTable 12.** Secondary Outcome: Development of vitreous hemorrhage within the ETDRS fields on masked UWF-color images or at clinical exam or receipt of DR treatment through 4 years by baseline DRSS level and PPL characteristics

**eTable 13.** Secondary Outcome: DRSS improvement by 2 or more steps within the ETDRS fields on masked UWF-color images through 4 years by baseline DRSS level and PPL characteristics

**eTable 14.** Exploratory Outcomes by Primary PPL Characteristics on UWF-Color and UWF-FA Images

This supplemental material has been provided by the authors to give readers additional information about their work.

## Abbreviations

| Abbreviation | Definition                                 |
|--------------|--------------------------------------------|
| ACR          | Albumin creatinine ratio                   |
| CI           | Confidence interval                        |
| CME          | Cystoid macular edema                      |
| CST          | Central subfield thickness                 |
| DME          | Diabetic macular edema                     |
| DR           | Diabetic retinopathy                       |
| DRSS         | Diabetic Retinopathy Severity Scale        |
| EGFR         | Estimated glomerular filtration rate       |
| ETDRS        | Early Treatment Diabetic Retinopathy Study |
| FA           | Fluorescein angiography                    |
| H/MA         | Hemorrhages and/or microaneurysms          |
| HbA1c        | Hemoglobin A1c                             |
| IPW          | Inverse probability weighted               |
| IRMA         | Intraretinal microvascular anomalies       |
| NPDR         | Non-proliferative diabetic retinopathy     |
| NVE          | New vessels/neovascularization elsewhere   |
| OCT          | Optical coherence tomography               |
| PC IOL       | Posterior chamber intraocular lenses       |
| PDR          | Proliferative diabetic retinopathy         |
| PPL          | Predominantly peripheral lesions           |
| PRP          | Panretinal photocoagulation                |
| UWF          | Ultrawide field                            |
| VB           | Venous beading                             |
| VEGF         | Vascular endothelial growth factor         |

**eFigure 1.** Cumulative proportion of disease worsening (DRSS worsening by 2 or more steps within the ETDRS fields on masked UWF-color images or receipt of DR treatment) through 4 years by baseline DRSS level on standard ETDRS fundus photographs

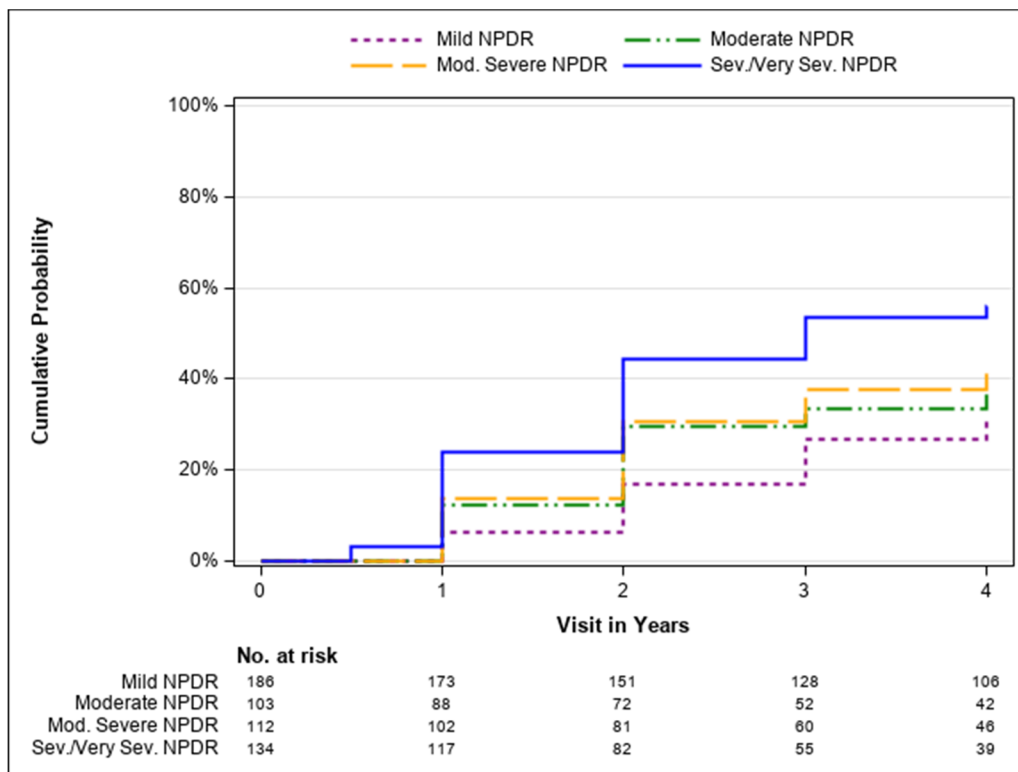

Stratified by the baseline DRSS level from the standard ETDRS fundus photographs. Two or more step DRSS worsening was determined within the ETDRS fields on the UWF-color images. Eyes receiving treatment with anti-VEGF, steroid, or vitrectomy for conditions other than DR were censored after treatment initiation. Eyes not meeting the primary outcome or receiving non-DR treatment were censored at the last visit. The cumulative proportion (95% confidence interval) of primary outcome was 31% (24%, 39%) in eyes with baseline mild NPDR, 37% (27%, 48%) with moderate NPDR, 43% (34%, 54%) with moderately severe NPDR, and 56% (47%, 65%) with severe or very severe NPDR.

**eFigure 2.** Stratified Analyses of Primary Outcome: DRSS worsening by 2 or more steps within the ETDRS fields on masked UWF-color images or receipt of DR treatment through 4 years by baseline DRSS level on UWF-color and color-PPL

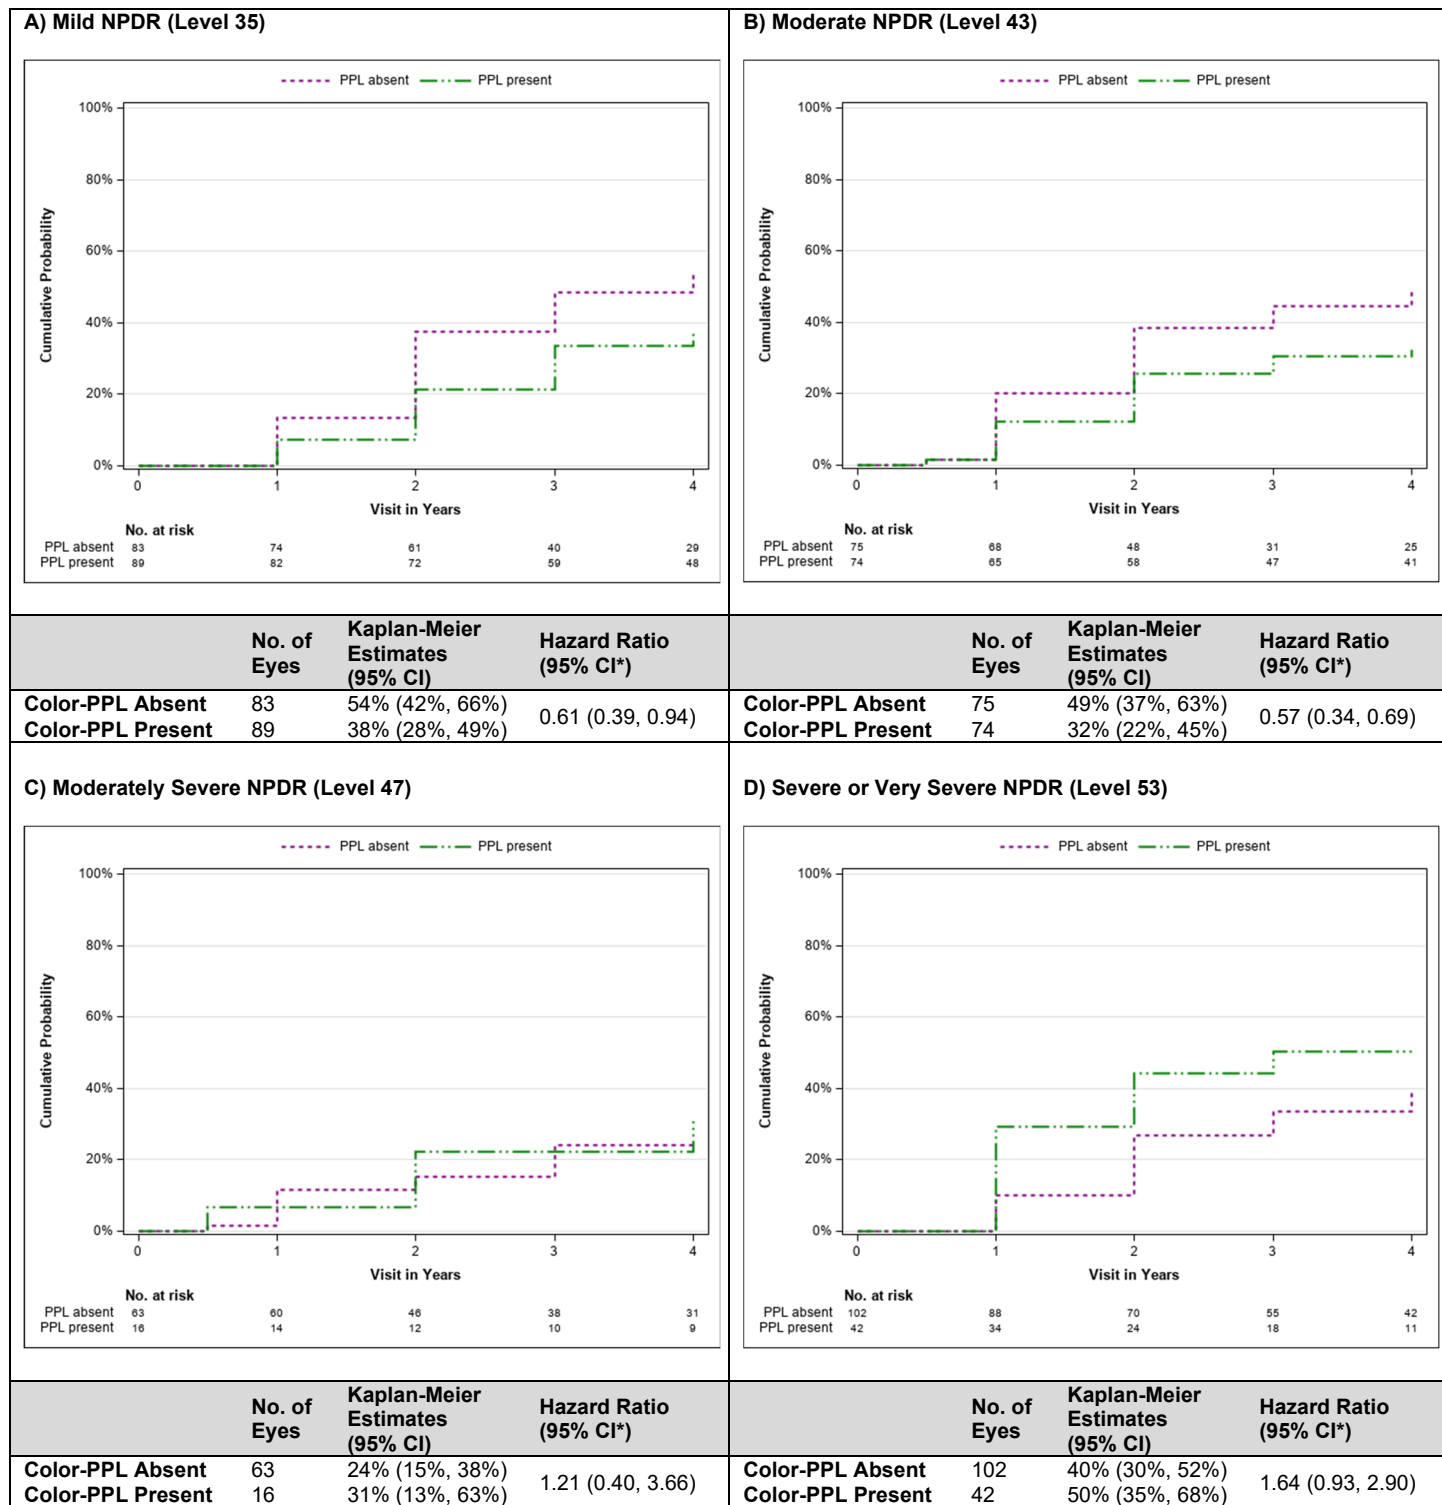

\*  $P = .02$  for interaction between DRSS level and color-PPL in the overall cohort.

**eFigure 3.** Stratified Analyses of Primary Outcome: DRSS worsening by 2 or more steps within the ETDRS fields on masked UWF-color images or receipt of DR treatment through 4 years by baseline DRSS level on UWF-color and FA-PPL

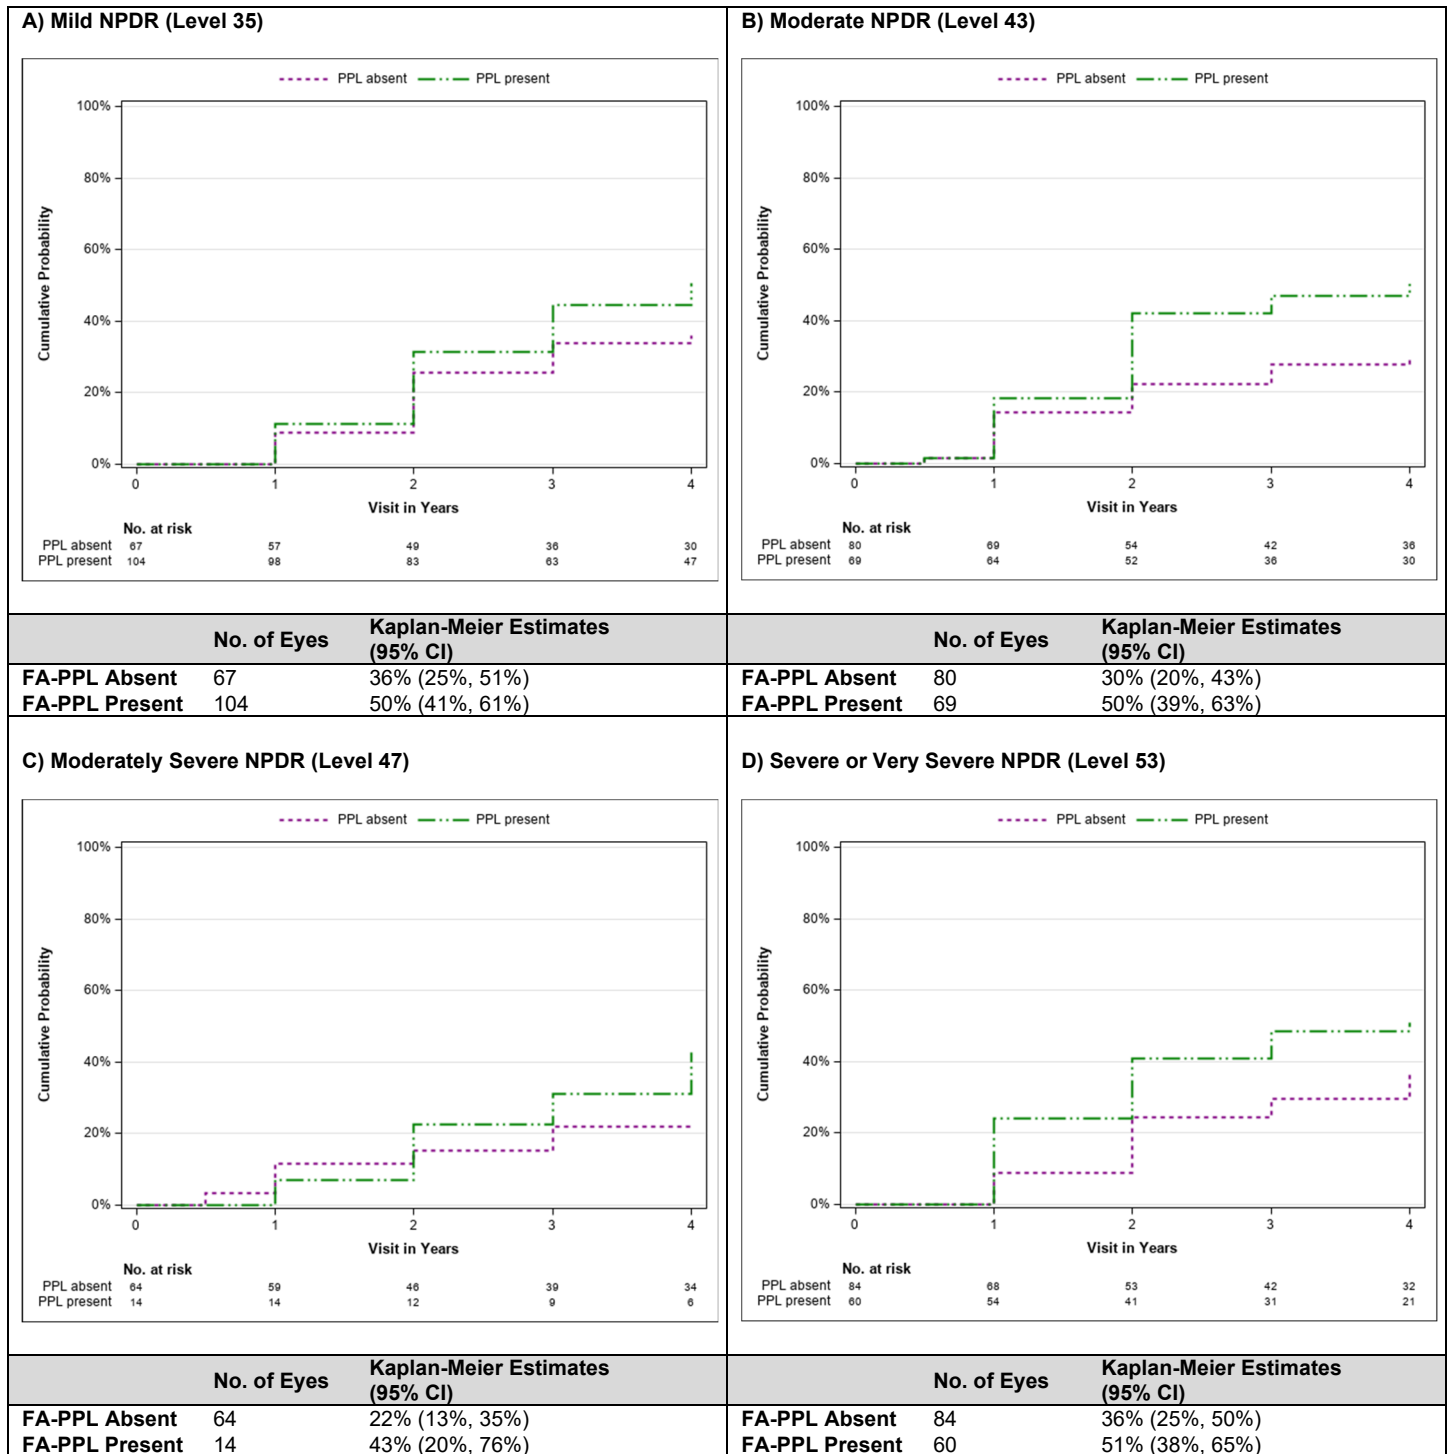

$P = .92$  for interaction between DRSS level and FA-PPL in the overall cohort

**eTable 1.** Visit Completion Over 4 Years

|                               | All Eyes   |               | By Color-PPL <sup>a</sup> |               |                   |               | By FA-PPL <sup>b</sup> |               |                |               |
|-------------------------------|------------|---------------|---------------------------|---------------|-------------------|---------------|------------------------|---------------|----------------|---------------|
|                               |            |               | Color-PPL Absent          |               | Color-PPL Present |               | FA-PPL Absent          |               | FA-PPL Present |               |
|                               | N          | (%)           | N                         | (%)           | N                 | (%)           | N                      | (%)           | N              | (%)           |
| <b>All Study Eyes</b>         | <b>544</b> | <b>(100%)</b> | <b>323</b>                | <b>(100%)</b> | <b>221</b>        | <b>(100%)</b> | <b>295</b>             | <b>(100%)</b> | <b>247</b>     | <b>(100%)</b> |
| <b>Year 1</b>                 |            |               |                           |               |                   |               |                        |               |                |               |
| Completed <sup>c</sup>        | <b>481</b> | <b>(88%)</b>  | <b>289</b>                | <b>(89%)</b>  | <b>192</b>        | <b>(87%)</b>  | <b>255</b>             | <b>(86%)</b>  | <b>224</b>     | <b>(91%)</b>  |
| Died                          | 9          | (2%)          | 5                         | (2%)          | 4                 | (2%)          | 4                      | (1%)          | 5              | (2%)          |
| Lost to follow up or withdrew | 36         | (7%)          | 21                        | (7%)          | 15                | (7%)          | 28                     | (9%)          | 8              | (3%)          |
| Missed <sup>d</sup>           | 18         | (3%)          | 8                         | (2%)          | 10                | (5%)          | 8                      | (3%)          | 10             | (4%)          |
| <b>Year 2</b>                 |            |               |                           |               |                   |               |                        |               |                |               |
| Completed <sup>c</sup>        | <b>456</b> | <b>(84%)</b>  | <b>270</b>                | <b>(84%)</b>  | <b>186</b>        | <b>(84%)</b>  | <b>235</b>             | <b>(80%)</b>  | <b>219</b>     | <b>(89%)</b>  |
| Died                          | 15         | (3%)          | 11                        | (3%)          | 4                 | (2%)          | 10                     | (3%)          | 5              | (2%)          |
| Lost to follow up or withdrew | 59         | (11%)         | 36                        | (11%)         | 23                | (10%)         | 44                     | (15%)         | 15             | (6%)          |
| Missed <sup>d</sup>           | 14         | (3%)          | 6                         | (2%)          | 8                 | (4%)          | 6                      | (2%)          | 8              | (3%)          |
| <b>Year 3</b>                 |            |               |                           |               |                   |               |                        |               |                |               |
| Completed <sup>c</sup>        | <b>426</b> | <b>(78%)</b>  | <b>242</b>                | <b>(75%)</b>  | <b>184</b>        | <b>(83%)</b>  | <b>216</b>             | <b>(73%)</b>  | <b>210</b>     | <b>(85%)</b>  |
| Died                          | 23         | (4%)          | 17                        | (5%)          | 6                 | (3%)          | 13                     | (4%)          | 10             | (4%)          |
| Lost to follow up or withdrew | 78         | (14%)         | 49                        | (15%)         | 29                | (13%)         | 56                     | (19%)         | 20             | (8%)          |
| Missed <sup>d</sup>           | 17         | (3%)          | 15                        | (5%)          | 2                 | (<1%)         | 10                     | (3%)          | 7              | (3%)          |
| <b>Year 4</b>                 |            |               |                           |               |                   |               |                        |               |                |               |
| Completed <sup>c</sup>        | <b>389</b> | <b>(72%)</b>  | <b>223</b>                | <b>(69%)</b>  | <b>166</b>        | <b>(75%)</b>  | <b>205</b>             | <b>(69%)</b>  | <b>184</b>     | <b>(74%)</b>  |
| Died                          | 38         | (7%)          | 26                        | (8%)          | 12                | (5%)          | 14                     | (5%)          | 24             | (10%)         |
| Lost to follow up or withdrew | 112        | (21%)         | 71                        | (22%)         | 41                | (19%)         | 75                     | (25%)         | 35             | (14%)         |
| Missed <sup>e</sup>           | 5          | (<1%)         | 3                         | (<1%)         | 2                 | (<1%)         | 1                      | (<1%)         | 4              | (2%)          |

<sup>a</sup> Includes study eyes with gradable baseline color-PPL status and baseline DRSS level 35-53.

<sup>b</sup> Includes study eyes with gradable baseline FA-PPL status and baseline DRSS level 35-53 (i.e., 2 eyes excluded due to ungradable FA-PPL).

<sup>c</sup> Counts all participants who completed the visit within the following windows ( $\pm 0.5$  years from the target): 183-547 days for 1-year visit, 548-912 days for 2-year visit, 913-1277 days for 3-year visit, and 1278-1642 days for 4-year visit. Numbers died and lost to follow up or withdrawn are cumulative.

<sup>d</sup> Includes participants who completed the visit outside of the analysis window or completed a phone-call visit after missing the annual visit.

<sup>e</sup> Eyes completing the visit outside the window were considered having missed the visit.

**eTable 2.** Baseline Characteristics by Baseline PPL Status

| All Study Eyes                                                     | By Baseline Color- PPL |                |                   |                | By Baseline FA-PPL |                |                |                |
|--------------------------------------------------------------------|------------------------|----------------|-------------------|----------------|--------------------|----------------|----------------|----------------|
|                                                                    | Color-PPL Absent       |                | Color-PPL Present |                | FA-PPL Absent      |                | FA-PPL Present |                |
| <b>No. of Eyes</b>                                                 | 323                    |                | 221               |                | 295                |                | 247            |                |
| <b>Participant Characteristics</b>                                 |                        |                |                   |                |                    |                |                |                |
| <b>Females, N (%)</b>                                              | 149                    | (46%)          | 115               | (52%)          | 125                | (42%)          | 137            | (55%)          |
| <b>Age (years), Median (IQR)</b>                                   | 61                     | (52, 69)       | 62                | (53, 68)       | 60                 | (51, 68)       | 63             | (54, 70)       |
| <b>Race/Ethnicity, N (%)</b>                                       |                        |                |                   |                |                    |                |                |                |
| White                                                              | 211                    | (65%)          | 162               | (73%)          | 194                | (66%)          | 178            | (72%)          |
| Black/African American                                             | 58                     | (18%)          | 36                | (16%)          | 52                 | (18%)          | 42             | (17%)          |
| Hispanic or Latino                                                 | 37                     | (11%)          | 13                | (6%)           | 36                 | (12%)          | 13             | (5%)           |
| Asian                                                              | 9                      | (3%)           | 5                 | (2%)           | 7                  | (2%)           | 7              | (3%)           |
| More than one race                                                 | 4                      | (1%)           | 2                 | (<1%)          | 2                  | (<1%)          | 4              | (2%)           |
| Native Hawaiian/Other Pacific Islander                             | 0                      | (0%)           | 1                 | (<1%)          | 1                  | (<1%)          | 0              | (0%)           |
| Unknown/not reported                                               | 4                      | (1%)           | 2                 | (<1%)          | 3                  | (1%)           | 3              | (1%)           |
| <b>Diabetes Type, N (%)</b>                                        |                        |                |                   |                |                    |                |                |                |
| Type 1                                                             | 26                     | (8%)           | 56                | (25%)          | 29                 | (10%)          | 53             | (21%)          |
| Type 2                                                             | 292                    | (90%)          | 164               | (74%)          | 261                | (88%)          | 193            | (78%)          |
| Uncertain                                                          | 5                      | (2%)           | 1                 | (<1%)          | 5                  | (2%)           | 1              | (<1%)          |
| <b>Duration of Diabetes (years), Median (IQR)</b>                  | 17                     | (12, 25)       | 24                | (16, 31)       | 17                 | (12, 25)       | 23             | (16, 30)       |
| <b>Hemoglobin A<sub>1c</sub> (%), Median (IQR) <sup>a</sup></b>    | 8.1                    | (7.0, 9.5)     | 7.8               | (7.1, 8.7)     | 8.0                | (7.1, 9.3)     | 7.9            | (7.0, 8.9)     |
| <b>Insulin Used, N (%)</b>                                         | 233                    | (72%)          | 169               | (76%)          | 210                | (71%)          | 190            | (77%)          |
| <b>Mean Arterial Pressure (mmHg), Median (IQR)</b>                 | 97                     | (91, 108)      | 96                | (88, 103)      | 99                 | (92, 108)      | 94             | (89, 102)      |
| <b>History of Hypertension, N (%)</b>                              | 244                    | (76%)          | 175               | (79%)          | 223                | (76%)          | 194            | (79%)          |
| <b>History of High Cholesterol/Dyslipidemia, N (%)</b>             | 220                    | (68%)          | 152               | (69%)          | 201                | (68%)          | 169            | (68%)          |
| <b>Taking Fenofibrate at Baseline, N (%)</b>                       | 13                     | (4%)           | 9                 | (4%)           | 12                 | (4%)           | 10             | (4%)           |
| <b>Taking Metformin at Baseline, N (%) <sup>b</sup></b>            | 155                    | (50%)          | 91                | (42%)          | 137                | (49%)          | 108            | (45%)          |
| <b>EGFR (mL/min/1.73 m<sup>2</sup>) <sup>c</sup></b>               |                        |                |                   |                |                    |                |                |                |
| Median (IQR)                                                       | 87                     | (61, 90)       | 90                | (64, 90)       | 89                 | (63, 90)       | 86             | (63, 90)       |
| < 60, N (%)                                                        | 42                     | (13%)          | 24                | (11%)          | 36                 | (12%)          | 30             | (12%)          |
| ≥ 60, N (%)                                                        | 149                    | (46%)          | 100               | (45%)          | 140                | 47%            | 108            | (44%)          |
| Unknown, N (%)                                                     | 132                    | (41%)          | 97                | (44%)          | 119                | 40%            | 109            | (44%)          |
| <b>Albumin Creatinine Ratio <sup>c</sup></b>                       |                        |                |                   |                |                    |                |                |                |
| Median (IQR)                                                       | 29                     | (11, 155)      | 12                | (4, 69)        | 27                 | (7, 112)       | 19             | (7, 63)        |
| No albuminuria (<30), N (%)                                        | 99                     | (31%)          | 80                | (36%)          | 97                 | (33%)          | 82             | (33%)          |
| Microalbuminuria (30-300), N (%)                                   | 59                     | (18%)          | 33                | (15%)          | 50                 | (17%)          | 41             | (17%)          |
| Macroalbuminuria (>300), N (%)                                     | 32                     | (10%)          | 9                 | (4%)           | 27                 | (9%)           | 14             | (6%)           |
| Unknown, N (%)                                                     | 133                    | (41%)          | 99                | (45%)          | 121                | (41%)          | 110            | (45%)          |
| <b>Participants with Two Study Eyes, N (%)</b>                     | 212                    | (66%)          | 142               | (64%)          | 197                | (67%)          | 157            | (64%)          |
| <b>Study Eye Ocular Characteristics</b>                            |                        |                |                   |                |                    |                |                |                |
| <b>Visual Acuity Letter Score, Median (IQR)</b>                    | 86                     | (89, 81)       | 86                | (90, 82)       | 85                 | (89, 82)       | 87             | (90, 81)       |
| <b>Snellen equivalent, Median (IQR)</b>                            | 20/20                  | (20/16, 20/25) | 20/20             | (20/16, 20/25) | 20/20              | (20/16, 20/25) | 20/20          | (20/16, 20/25) |
| <b>DRSS Level by Reading Center Assessment (UWF Masked), N (%)</b> |                        |                |                   |                |                    |                |                |                |
| Mild NPDR (Level 35)                                               | 83                     | (26%)          | 89                | (40%)          | 67                 | (23%)          | 104            | (42%)          |
| Moderate NPDR (Level 43)                                           | 75                     | (23%)          | 74                | (33%)          | 80                 | (27%)          | 69             | (28%)          |
| Moderately Severe NPDR (Level 47)                                  | 63                     | (20%)          | 16                | (7%)           | 64                 | (22%)          | 14             | (6%)           |
| Severe and Very Severe NPDR (Level 53)                             | 102                    | (32%)          | 42                | (19%)          | 84                 | (28%)          | 60             | (24%)          |

| All Study Eyes                                                                                            | By Baseline Color- PPL |            |                   |            | By Baseline FA-PPL |            |                |            |
|-----------------------------------------------------------------------------------------------------------|------------------------|------------|-------------------|------------|--------------------|------------|----------------|------------|
|                                                                                                           | Color-PPL Absent       |            | Color-PPL Present |            | FA-PPL Absent      |            | FA-PPL Present |            |
| <b>No. of Eyes</b>                                                                                        | 323                    |            | 221               |            | 295                |            | 247            |            |
| <b>DRSS Level by Reading Center Assessment (UWF Unmasked), N (%)</b>                                      |                        |            |                   |            |                    |            |                |            |
| Mild NPDR (Level 35)                                                                                      | 79                     | (24%)      | 59                | (27%)      | 60                 | (20%)      | 77             | (31%)      |
| Moderate NPDR (Level 43)                                                                                  | 76                     | (24%)      | 57                | (26%)      | 74                 | (25%)      | 59             | (24%)      |
| Moderately Severe NPDR (Level 47)                                                                         | 66                     | (20%)      | 37                | (17%)      | 64                 | (22%)      | 38             | (15%)      |
| Severe and Very Severe NPDR (Level 53)                                                                    | 99                     | (31%)      | 59                | (27%)      | 93                 | (32%)      | 65             | (26%)      |
| Inactive PDR (Level 60) or Mild PDR (Level 61)                                                            | 2                      | (<1%)      | 4                 | (2%)       | 3                  | (1%)       | 3              | (1%)       |
| Moderate PDR (Level 65)                                                                                   | 0                      | (0%)       | 5                 | (2%)       | 0                  | (0%)       | 5              | (2%)       |
| Ungradable                                                                                                | 1                      | (<1%)      | 0                 | (0%)       | 1                  | (<1%)      | 0              | (0%)       |
| <b>Difference in DRSS Level by Reading Center Assessment (UWF Unmasked vs. Masked), N (%)<sup>d</sup></b> |                        |            |                   |            |                    |            |                |            |
| UWF unmasked worse                                                                                        | 12                     | (4%)       | 74                | (33%)      | 28                 | (10%)      | 58             | (23%)      |
| Same grading                                                                                              | 306                    | (95%)      | 144               | (65%)      | 262                | (89%)      | 186            | (75%)      |
| UWF masked worse                                                                                          | 4                      | (1%)       | 3                 | (1%)       | 4                  | (1%)       | 3              | (1%)       |
| <b>Lens Status, N (%)</b>                                                                                 |                        |            |                   |            |                    |            |                |            |
| Aphakic                                                                                                   | 1                      | (<1%)      | 0                 | (0%)       | 1                  | (<1%)      | 0              | (0%)       |
| PC IOL                                                                                                    | 76                     | (24%)      | 58                | (26%)      | 54                 | (18%)      | 79             | (32%)      |
| Phakic                                                                                                    | 246                    | (76%)      | 163               | (74%)      | 240                | (81%)      | 168            | (68%)      |
| <b>OCT CST Spectralis Equivalent (µm), Median (IQR)<sup>e</sup></b>                                       | 278                    | (259, 295) | 276               | (262, 295) | 279                | (263, 297) | 275            | (255, 294) |
| <b>OCT Volume (mm<sup>2</sup>), Median (IQR)<sup>f</sup></b>                                              | 7.0                    | (6.6, 7.3) | 6.9               | (6.6, 7.3) | 7.1                | (6.7, 7.4) | 6.8            | (6.5, 7.2) |
| <b>History of DME Treatment, N (%)</b>                                                                    | 58                     | (18%)      | 61                | (28%)      | 55                 | (19%)      | 64             | (26%)      |
| Focal laser                                                                                               | 54                     | (17%)      | 60                | (27%)      | 54                 | (18%)      | 60             | (24%)      |
| Anti-VEGF                                                                                                 | 22                     | (7%)       | 9                 | (4%)       | 14                 | (5%)       | 17             | (7%)       |
| Corticosteroids (including implants)                                                                      | 5                      | (2%)       | 0                 | (0%)       | 4                  | (1%)       | 1              | (<1%)      |
| <b>Predominantly Peripheral Lesions on UWF-Color, N (%)</b>                                               | --                     | --         | --                | --         | 85                 | (29%)      | 136            | (55%)      |
| <b>Predominantly Peripheral Lesions on UWF-FA, N (%)<sup>g</sup></b>                                      | 111                    | (35%)      | 136               | (62%)      | --                 | --         | --             | --         |

<sup>a</sup> Unavailable for 4 eyes without color-PPL and 3 with color-PPL; 2 eyes without FA-PPL and 5 with FA-PPL.

<sup>b</sup> Unavailable for 16 eyes without color-PPL and 2 with color-PPL; 13 eyes without FA-PPL, and 5 with FA-PPL. Percentage is based on eyes with available information.

<sup>c</sup> Blood and urine samples were implemented approximately five months after study recruitment began.

<sup>d</sup> Excluding one eye (without color-PPL and FA-PPL) with ungradable unmasked grade. Percentage is based on eyes with available information.

<sup>e</sup> Cirrus measurements were converted to Spectralis equivalents using the following formula: Spectralis = 40.78 + 0.95 × Cirrus.

<sup>f</sup> Retinal volume measurements were converted to Stratus equivalents using the following formulae: Stratus = -1.21 + 1.02 × Cirrus; Stratus = -2.05 + 1.06 × Spectralis.

<sup>g</sup> FA-PPL were ungradable for 2 eyes. Percentage is based on eyes with available information.



**eTable 3.** Baseline Characteristics by 4-Year Visit Completion

|                                                                                     | By 4-Year Visit Completion |                |            |                |
|-------------------------------------------------------------------------------------|----------------------------|----------------|------------|----------------|
|                                                                                     | Non-Completers             |                | Completers |                |
| <b>No. of Participants</b>                                                          | 106                        |                | 261        |                |
| <b>Participant Characteristics</b>                                                  |                            |                |            |                |
| <b>Females, N (%)</b>                                                               | 56                         | (53%)          | 126        | (48%)          |
| <b>Age (years), Median (IQR)</b>                                                    | 62                         | (51, 69)       | 62         | (54, 69)       |
| <b>Race/Ethnicity, N (%)</b>                                                        |                            |                |            |                |
| White                                                                               | 70                         | (66%)          | 179        | (69%)          |
| Black/African American                                                              | 21                         | (20%)          | 47         | (18%)          |
| Hispanic or Latino                                                                  | 12                         | (11%)          | 20         | (8%)           |
| Asian                                                                               | 1                          | (<1%)          | 9          | (3%)           |
| More than one race                                                                  | 1                          | (<1%)          | 2          | (<1%)          |
| Native Hawaiian/Other Pacific Islander                                              | 0                          | (0%)           | 1          | (<1%)          |
| Unknown/not reported                                                                | 1                          | (<1%)          | 3          | (1%)           |
| <b>Diabetes Type, N (%)</b>                                                         |                            |                |            |                |
| Type 1                                                                              | 10                         | (9%)           | 40         | (15%)          |
| Type 2                                                                              | 95                         | (90%)          | 218        | (84%)          |
| Uncertain                                                                           | 1                          | (<1%)          | 3          | (1%)           |
| <b>Duration of Diabetes (years), Median (IQR)</b>                                   | 17                         | (12, 26)       | 21         | (14, 28)       |
| <b>Hemoglobin A<sub>1c</sub> (%), Median (IQR)<sup>a</sup></b>                      | 8.1                        | (7.2, 9.2)     | 7.8        | (7.0, 9.0)     |
| <b>Insulin Used, N (%)</b>                                                          | 73                         | (69%)          | 192        | (74%)          |
| <b>Mean Arterial Pressure (mmHg), Median (IQR)</b>                                  | 97                         | (90, 107)      | 97         | (91, 105)      |
| <b>History of Hypertension, N (%)</b>                                               | 79                         | (75%)          | 208        | (80%)          |
| <b>History of High Cholesterol/Dyslipidemia, N (%)</b>                              | 73                         | (69%)          | 184        | (70%)          |
| <b>Taking Fenofibrate at Baseline, N (%)</b>                                        | 9                          | (8%)           | 6          | (2%)           |
| <b>Taking Metformin at Baseline, N (%)<sup>b</sup></b>                              | 40                         | (40%)          | 130        | (51%)          |
| <b>Estimated Glomerular Filtration Rate (mL/min/1.73 m<sup>2</sup>)<sup>c</sup></b> |                            |                |            |                |
| Median (IQR)                                                                        | 81                         | (48, 90)       | 88         | (63, 90)       |
| < 60, N (%)                                                                         | 17                         | (16%)          | 32         | (12%)          |
| ≥ 60, N (%)                                                                         | 39                         | (37%)          | 124        | (48%)          |
| Unknown, N (%)                                                                      | 50                         | (47%)          | 105        | (40%)          |
| <b>Albumin Creatinine Ratio<sup>c</sup></b>                                         |                            |                |            |                |
| Median (IQR)                                                                        | 46                         | (12, 148)      | 20         | (7, 77)        |
| No albuminuria (<30), N (%)                                                         | 25                         | (24%)          | 92         | (35%)          |
| Microalbuminuria (30-300), N (%)                                                    | 21                         | (20%)          | 42         | (16%)          |
| Macroalbuminuria (>300), N (%)                                                      | 10                         | (9%)           | 19         | (7%)           |
| Unknown, N (%)                                                                      | 50                         | (47%)          | 108        | (41%)          |
| <b>Participants with two study eyes, N (%)</b>                                      | 49                         | (46%)          | 128        | (49%)          |
| <b>Study Eye Ocular Characteristics</b>                                             |                            |                |            |                |
| <b>No. of Study Eyes</b>                                                            | 155                        |                | 389        |                |
| <b>Visual Acuity Letter Score, Median (IQR)</b>                                     | 84                         | (88, 79)       | 86         | (90, 82)       |
| <b>Snellen equivalent, Median (IQR)</b>                                             | 20/20                      | (20/20, 20/25) | 20/20      | (20/16, 20/25) |
| <b>DRSS Level by Reading Center Assessment (UWF Masked), N (%)</b>                  |                            |                |            |                |
| Mild NPDR (Level 35)                                                                | 46                         | (30%)          | 126        | (32%)          |
| Moderate NPDR (Level 43)                                                            | 39                         | (25%)          | 110        | (28%)          |
| Moderately Severe NPDR (Level 47)                                                   | 19                         | (12%)          | 60         | (15%)          |
| Severe and Very Severe NPDR (Level 53)                                              | 51                         | (33%)          | 93         | (24%)          |
| <b>DRSS Level by Reading Center Assessment (UWF Unmasked), N (%)</b>                |                            |                |            |                |
| Mild NPDR (Level 35)                                                                | 40                         | (26%)          | 98         | (25%)          |
| Moderate NPDR (Level 43)                                                            | 32                         | (21%)          | 101        | (26%)          |

|                                                                                               | By 4-Year Visit Completion |            |            |            |
|-----------------------------------------------------------------------------------------------|----------------------------|------------|------------|------------|
|                                                                                               | Non-Completers             |            | Completers |            |
| Moderately Severe NPDR (Level 47)                                                             | 28                         | (18%)      | 75         | (19%)      |
| Severe and Very Severe NPDR (Level 53)                                                        | 52                         | (34%)      | 106        | (27%)      |
| Inactive PDR (Level 60) or Mild PDR (Level 61)                                                | 3                          | (2%)       | 3          | (<1%)      |
| Moderate PDR (Level 65)                                                                       | 0                          | (0%)       | 5          | (1%)       |
| Ungradable                                                                                    | 0                          | (0%)       | 1          | (<1%)      |
| <b>Difference in DRSS Level by Reading Center Assessment (UWF Unmasked vs. Masked), N (%)</b> |                            |            |            |            |
| UWF unmasked worse                                                                            | 21                         | (14%)      | 65         | (17%)      |
| Same grading                                                                                  | 130                        | (84%)      | 320        | (82%)      |
| UWF masked worse                                                                              | 4                          | (3%)       | 3          | (<1%)      |
| <b>Lens Status, N (%)</b>                                                                     |                            |            |            |            |
| Aphakic                                                                                       | 0                          | (0%)       | 1          | (<1%)      |
| PC IOL                                                                                        | 39                         | (25%)      | 95         | (24%)      |
| Phakic                                                                                        | 116                        | (75%)      | 293        | (75%)      |
| <b>OCT CST Spectralis Equivalent (µm), Median (IQR)<sup>f</sup></b>                           | 274                        | (255, 293) | 279        | (263, 296) |
| <b>OCT Volume (mm<sup>2</sup>), Median (IQR)<sup>f</sup></b>                                  | 7.0                        | (6.6, 7.3) | 6.9        | (6.6, 7.3) |
| <b>History of DME Treatment, N (%)</b>                                                        |                            |            |            |            |
| Focal laser                                                                                   | 20                         | (13%)      | 99         | (25%)      |
| Anti-VEGF                                                                                     | 7                          | (5%)       | 24         | (6%)       |
| Corticosteroids (including implants)                                                          | 1                          | (<1%)      | 4          | (1%)       |
| <b>Predominantly Peripheral Lesions on UWF-Color, N (%)</b>                                   | 55                         | (35%)      | 166        | (43%)      |
| <b>Predominantly Peripheral Lesions on UWF-FA, N (%)<sup>g</sup></b>                          | 63                         | (41%)      | 184        | (47%)      |

<sup>a</sup> Unavailable for 6 participants (2 non-completers and 4 completers)

<sup>b</sup> Unavailable for 6 non-completers and 5 completers. Percentage is based on participants with available information

<sup>c</sup> Blood and urine samples were implemented approximately five months after study recruitment began.

<sup>d</sup> Excluding one eye with ungradable unmasked grade. % Percentage based on eyes with available information.

<sup>e</sup> Cirrus measurements were converted to Spectralis equivalents using the following formula: Spectralis = 40.78 + 0.95 × Cirrus.

<sup>f</sup> Retinal volume measurements were converted to Stratus equivalents using the following formulae: Stratus = -1.21 + 1.02 × Cirrus; Stratus = -2.05 + 1.06 × Spectralis.

<sup>g</sup> FA-PPL were ungradable for 2 eyes. Percentage is based on eyes with available information.

**eTable 4.** Comparison of Baseline PPL on UWF-Color and UWF-FA Images

|                                                     | PPL Characteristics on UWF-FA <sup>a</sup> |                |              |
|-----------------------------------------------------|--------------------------------------------|----------------|--------------|
| PPL Characteristics on UWF-color image <sup>a</sup> | Absent                                     | Present        | Total        |
| <b>PPL Status, N (%)</b>                            |                                            |                |              |
| Absent                                              | 210 (39%)                                  | 111 (20%)      | 321 (59%)    |
| Present                                             | 85 (16%)                                   | 136 (25%)      | 221 (41%)    |
| <b>Total</b>                                        | 295 (54%)                                  | 247 (46%)      | 542 (100%)   |
| <b>PPL Status for H/Ma, N (%)</b>                   | <b>Absent</b>                              | <b>Present</b> | <b>Total</b> |
| Absent                                              | 248 (46%)                                  | 111 (21%)      | 359 (67%)    |
| Present                                             | 66 (12%)                                   | 114 (21%)      | 180 (33%)    |
| <b>Total</b>                                        | 314 (58%)                                  | 225 (42%)      | 539 (100%)   |
| <b>PPL Status for IRMA, N (%)</b>                   | <b>Absent</b>                              | <b>Present</b> | <b>Total</b> |
| Absent                                              | 367 (69%)                                  | 79 (15%)       | 446 (84%)    |
| Present                                             | 53 (10%)                                   | 31 (6%)        | 84 (16%)     |
| <b>Total</b>                                        | 420 (79%)                                  | 110 (21%)      | 530 (100%)   |
| <b>PPL Status for VB, N (%)</b>                     | <b>Absent</b>                              | <b>Present</b> | <b>Total</b> |
| Absent                                              | 528 (99%)                                  | 3 (<1%)        | 531 (>99%)   |
| Present                                             | 4 (<1%)                                    | 1 (<1%)        | 5 (<1%)      |
| <b>Total</b>                                        | 532 (>99%)                                 | 4 (<1%)        | 536 (100%)   |
| <b>PPL Status for NVE, N (%)</b>                    | <b>Absent</b>                              | <b>Present</b> | <b>Total</b> |
| Absent                                              | 510 (94%)                                  | 24 (4%)        | 534 (99%)    |
| Present                                             | 2 (<1%)                                    | 6 (1%)         | 8 (1%)       |
| <b>Total</b>                                        | 512 (94%)                                  | 30 (6%)        | 542 (100%)   |
| <b>PPL Status in Field 3, N (%)</b>                 | <b>Absent</b>                              | <b>Present</b> | <b>Total</b> |
| Absent                                              | 365 (68%)                                  | 81 (15%)       | 446 (83%)    |
| Present                                             | 35 (7%)                                    | 54 (10%)       | 89 (17%)     |
| <b>Total</b>                                        | 400 (75%)                                  | 135 (25%)      | 535 (100%)   |
| <b>PPL Status in Field 4, N (%)</b>                 | <b>Absent</b>                              | <b>Present</b> | <b>Total</b> |
| Absent                                              | 350 (66%)                                  | 90 (17%)       | 440 (83%)    |
| Present                                             | 30 (6%)                                    | 63 (12%)       | 93 (17%)     |
| <b>Total</b>                                        | 380 (71%)                                  | 153 (29%)      | 533 (100%)   |
| <b>PPL Status in Field 5, N (%)</b>                 | <b>Absent</b>                              | <b>Present</b> | <b>Total</b> |
| Absent                                              | 382 (73%)                                  | 69 (13%)       | 451 (86%)    |
| Present                                             | 38 (7%)                                    | 36 (7%)        | 74 (14%)     |
| <b>Total</b>                                        | 420 (80%)                                  | 105 (20%)      | 525 (100%)   |
| <b>PPL Status in Field 6, N (%)</b>                 | <b>Absent</b>                              | <b>Present</b> | <b>Total</b> |
| Absent                                              | 330 (62%)                                  | 118 (22%)      | 448 (84%)    |
| Present                                             | 42 (8%)                                    | 43 (8%)        | 85 (16%)     |
| <b>Total</b>                                        | 372 (70%)                                  | 161 (30%)      | 533 (100%)   |
| <b>PPL Status in Field 7, N (%)</b>                 | <b>Absent</b>                              | <b>Present</b> | <b>Total</b> |
| Absent                                              | 352 (71%)                                  | 86 (17%)       | 438 (88%)    |
| Present                                             | 44 (9%)                                    | 14 (3%)        | 58 (12%)     |
| <b>Total</b>                                        | 396 (80%)                                  | 100 (20%)      | 496 (100%)   |

|                                                           | <b>PPL Characteristics on UWF-FA<sup>a</sup></b> |                          |                            |                   |
|-----------------------------------------------------------|--------------------------------------------------|--------------------------|----------------------------|-------------------|
| <b>PPL Characteristics on UWF-color image<sup>a</sup></b> |                                                  |                          |                            |                   |
| <b>Number of peripheral fields with PPL, N (%)</b>        | <b>No FA-PPL</b>                                 | <b>FA-PPL in 1 Field</b> | <b>FA-PPL in ≥2 Fields</b> | <b>Total</b>      |
| No PPL                                                    | 210 (39%)                                        | 50 (9%)                  | 61 (11%)                   | 321 (59%)         |
| PPL in 1 Field                                            | 60 (11%)                                         | 19 (4%)                  | 39 (7%)                    | 118 (22%)         |
| PPL in ≥2 Fields                                          | 25 (5%)                                          | 6 (1%)                   | 72 (13%)                   | 103 (19%)         |
| <b>Total</b>                                              | <b>295 (54%)</b>                                 | <b>75 (14%)</b>          | <b>172 (32%)</b>           | <b>542 (100%)</b> |

<sup>a</sup> Limited to eyes with gradable color-PPL and FA-PPL in each region.

**eTable 5.** Treatment Initiation During Follow-up by Baseline DRSS Level

| Treatment During Follow-up                                                                               | By Baseline Color-PPL |              |                   |              | By Baseline FA-PPL |              |                |              |
|----------------------------------------------------------------------------------------------------------|-----------------------|--------------|-------------------|--------------|--------------------|--------------|----------------|--------------|
|                                                                                                          | Color-PPL Absent      |              | Color-PPL Present |              | FA-PPL Absent      |              | FA-PPL Present |              |
| <b>Overall</b>                                                                                           |                       |              |                   |              |                    |              |                |              |
| <b>No. of Eyes</b>                                                                                       | <b>323</b>            |              | <b>221</b>        |              | <b>295</b>         |              | <b>247</b>     |              |
| <b>Received Treatment for DR or DME, N (%)</b>                                                           | <b>72</b>             | <b>(22%)</b> | <b>26</b>         | <b>(12%)</b> | <b>62</b>          | <b>(21%)</b> | <b>35</b>      | <b>(14%)</b> |
| <b>Received Treatment for DR, N (%)</b>                                                                  | <b>37</b>             | <b>(11%)</b> | <b>21</b>         | <b>(10%)</b> | <b>31</b>          | <b>(11%)</b> | <b>26</b>      | <b>(11%)</b> |
| PRP                                                                                                      | 19                    | (6%)         | 17                | (8%)         | 19                 | (6%)         | 17             | (7%)         |
| Anti-VEGF                                                                                                | 23                    | (7%)         | 12                | (5%)         | 19                 | (6%)         | 15             | (6%)         |
| Steroid                                                                                                  | 0                     | (0%)         | 0                 | (0%)         | 0                  | (0%)         | 0              | (0%)         |
| Vitrectomy                                                                                               | 0                     | (0%)         | 3                 | (1%)         | 1                  | (0%)         | 2              | (1%)         |
| Other                                                                                                    | 0                     | (0%)         | 0                 | (0%)         | 0                  | (0%)         | 0              | (0%)         |
| <b>Received Treatment for DME, N (%)</b>                                                                 | <b>58</b>             | <b>(18%)</b> | <b>16</b>         | <b>(7%)</b>  | <b>51</b>          | <b>(17%)</b> | <b>22</b>      | <b>(9%)</b>  |
| Focal Laser                                                                                              | 20                    | (6%)         | 7                 | (3%)         | 17                 | (6%)         | 10             | (4%)         |
| Anti-VEGF                                                                                                | 47                    | (15%)        | 10                | (5%)         | 42                 | (14%)        | 14             | (6%)         |
| Steroid                                                                                                  | 0                     | (0%)         | 1                 | (0%)         | 1                  | (0%)         | 0              | (0%)         |
| Vitrectomy                                                                                               | 0                     | (0%)         | 0                 | (0%)         | 0                  | (0%)         | 0              | (0%)         |
| Other <sup>a</sup>                                                                                       | 1                     | (0%)         | 1                 | (0%)         | 1                  | (0%)         | 1              | (0%)         |
| <b>Received Anti-VEGF, Steroid, or Vitrectomy for Conditions Other Than DR or DME, N (%)<sup>b</sup></b> | <b>6</b>              | <b>(2%)</b>  | <b>2</b>          | <b>(1%)</b>  | <b>5</b>           | <b>(2%)</b>  | <b>3</b>       | <b>(1%)</b>  |
| <b>Mild NPDR (Level 35)</b>                                                                              |                       |              |                   |              |                    |              |                |              |
| <b>No. of Eyes</b>                                                                                       | <b>83</b>             |              | <b>89</b>         |              | <b>67</b>          |              | <b>104</b>     |              |
| <b>Received Treatment for DR or DME, N (%)</b>                                                           | <b>9</b>              | <b>(11%)</b> | <b>5</b>          | <b>(6%)</b>  | <b>8</b>           | <b>(12%)</b> | <b>6</b>       | <b>(6%)</b>  |
| <b>Received Treatment for DR, N (%)</b>                                                                  | <b>3</b>              | <b>(4%)</b>  | <b>2</b>          | <b>(2%)</b>  | <b>3</b>           | <b>(4%)</b>  | <b>2</b>       | <b>(2%)</b>  |
| PRP                                                                                                      | 3                     | (4%)         | 2                 | (2%)         | 3                  | (4%)         | 2              | (2%)         |
| Anti-VEGF                                                                                                | 0                     | (0%)         | 1                 | (1%)         | 0                  | (0%)         | 1              | (1%)         |
| Steroid                                                                                                  | 0                     | (0%)         | 0                 | (0%)         | 0                  | (0%)         | 0              | (0%)         |
| Vitrectomy                                                                                               | 0                     | (0%)         | 0                 | (0%)         | 0                  | (0%)         | 0              | (0%)         |
| Other                                                                                                    | 0                     | (0%)         | 0                 | (0%)         | 0                  | (0%)         | 0              | (0%)         |
| <b>Received Treatment for DME, N (%)</b>                                                                 | <b>7</b>              | <b>(8%)</b>  | <b>3</b>          | <b>(3%)</b>  | <b>5</b>           | <b>(7%)</b>  | <b>5</b>       | <b>(5%)</b>  |
| Focal Laser                                                                                              | 4                     | (5%)         | 3                 | (3%)         | 4                  | (6%)         | 3              | (3%)         |
| Anti-VEGF                                                                                                | 4                     | (5%)         | 1                 | (1%)         | 3                  | (4%)         | 2              | (2%)         |
| Steroid                                                                                                  | 0                     | (0%)         | 0                 | (0%)         | 0                  | (0%)         | 0              | (0%)         |
| Vitrectomy                                                                                               | 0                     | (0%)         | 0                 | (0%)         | 0                  | (0%)         | 0              | (0%)         |
| Other                                                                                                    | 0                     | (0%)         | 0                 | (0%)         | 0                  | (0%)         | 0              | (0%)         |
| <b>Received Anti-VEGF, Steroid, or Vitrectomy for Conditions Other Than DR or DME, N (%)</b>             | <b>0</b>              | <b>(0%)</b>  | <b>0</b>          | <b>(0%)</b>  | <b>0</b>           | <b>(0%)</b>  | <b>0</b>       | <b>(0%)</b>  |
| <b>Moderate NPDR (Level 43)</b>                                                                          |                       |              |                   |              |                    |              |                |              |
| <b>No. of Eyes</b>                                                                                       | <b>75</b>             |              | <b>74</b>         |              | <b>80</b>          |              | <b>69</b>      |              |
| <b>Received Treatment for DR or DME, N (%)</b>                                                           | <b>19</b>             | <b>(25%)</b> | <b>4</b>          | <b>(5%)</b>  | <b>14</b>          | <b>(18%)</b> | <b>9</b>       | <b>(13%)</b> |
| <b>Received Treatment for DR, N (%)</b>                                                                  | <b>7</b>              | <b>(9%)</b>  | <b>4</b>          | <b>(5%)</b>  | <b>5</b>           | <b>(6%)</b>  | <b>6</b>       | <b>(9%)</b>  |
| PRP                                                                                                      | 4                     | (5%)         | 3                 | (4%)         | 2                  | (3%)         | 5              | (7%)         |
| Anti-VEGF                                                                                                | 3                     | (4%)         | 3                 | (4%)         | 3                  | (4%)         | 3              | (4%)         |
| Steroid                                                                                                  | 0                     | (0%)         | 0                 | (0%)         | 0                  | (0%)         | 0              | (0%)         |
| Vitrectomy                                                                                               | 0                     | (0%)         | 1                 | (1%)         | 0                  | (0%)         | 1              | (1%)         |
| Other                                                                                                    | 0                     | (0%)         | 0                 | (0%)         | 0                  | (0%)         | 0              | (0%)         |

| Treatment During Follow-up                                                                   | By Baseline Color-PPL |              |                   |              | By Baseline FA-PPL |              |                |              |
|----------------------------------------------------------------------------------------------|-----------------------|--------------|-------------------|--------------|--------------------|--------------|----------------|--------------|
|                                                                                              | Color-PPL Absent      |              | Color-PPL Present |              | FA-PPL Absent      |              | FA-PPL Present |              |
| <b>Received Treatment for DME, N (%)</b>                                                     | <b>16</b>             | <b>(21%)</b> | <b>2</b>          | <b>(3%)</b>  | <b>13</b>          | <b>(16%)</b> | <b>5</b>       | <b>(7%)</b>  |
| Focal Laser                                                                                  | 7                     | (9%)         | 0                 | (0%)         | 4                  | (5%)         | 3              | (4%)         |
| Anti-VEGF                                                                                    | 13                    | (17%)        | 1                 | (1%)         | 11                 | (14%)        | 3              | (4%)         |
| Steroid                                                                                      | 0                     | (0%)         | 1                 | (1%)         | 1                  | (1%)         | 0              | (0%)         |
| Vitrectomy                                                                                   | 0                     | (0%)         | 0                 | (0%)         | 0                  | (0%)         | 0              | (0%)         |
| Other <sup>a</sup>                                                                           | 1                     | (1%)         | 1                 | (1%)         | 1                  | (1%)         | 1              | (1%)         |
| <b>Received Anti-VEGF, Steroid, or Vitrectomy for Conditions Other Than DR or DME, N (%)</b> | <b>2</b>              | <b>(3%)</b>  | <b>1</b>          | <b>(1%)</b>  | <b>3</b>           | <b>(4%)</b>  | <b>0</b>       | <b>(0%)</b>  |
| <b>Moderately Severe NPDR (Level 47)</b>                                                     |                       |              |                   |              |                    |              |                |              |
| <b>No. of Eyes</b>                                                                           | <b>63</b>             |              | <b>16</b>         |              | <b>64</b>          |              | <b>14</b>      |              |
| <b>Received Treatment for DR or DME, N (%)</b>                                               | <b>15</b>             | <b>(24%)</b> | <b>4</b>          | <b>(25%)</b> | <b>14</b>          | <b>(22%)</b> | <b>4</b>       | <b>(29%)</b> |
| <b>Received Treatment for DR, N (%)</b>                                                      | <b>10</b>             | <b>(16%)</b> | <b>4</b>          | <b>(25%)</b> | <b>9</b>           | <b>(14%)</b> | <b>4</b>       | <b>(29%)</b> |
| PRP                                                                                          | 7                     | (11%)        | 3                 | (19%)        | 7                  | (11%)        | 3              | (21%)        |
| Anti-VEGF                                                                                    | 6                     | (10%)        | 3                 | (19%)        | 6                  | (9%)         | 2              | (14%)        |
| Steroid                                                                                      | 0                     | (0%)         | 0                 | (0%)         | 0                  | (0%)         | 0              | (0%)         |
| Vitrectomy                                                                                   | 0                     | (0%)         | 1                 | (6%)         | 1                  | (2%)         | 0              | (0%)         |
| Other                                                                                        | 0                     | (0%)         | 0                 | (0%)         | 0                  | (0%)         | 0              | (0%)         |
| <b>Received Treatment for DME, N (%)</b>                                                     | <b>12</b>             | <b>(19%)</b> | <b>3</b>          | <b>(19%)</b> | <b>12</b>          | <b>(19%)</b> | <b>2</b>       | <b>(14%)</b> |
| Focal Laser                                                                                  | 2                     | (3%)         | 0                 | (0%)         | 1                  | (2%)         | 1              | (7%)         |
| Anti-VEGF                                                                                    | 11                    | (17%)        | 3                 | (19%)        | 11                 | (17%)        | 2              | (14%)        |
| Steroid                                                                                      | 0                     | (0%)         | 0                 | (0%)         | 0                  | (0%)         | 0              | (0%)         |
| Vitrectomy                                                                                   | 0                     | (0%)         | 0                 | (0%)         | 0                  | (0%)         | 0              | (0%)         |
| Other                                                                                        | 0                     | (0%)         | 0                 | (0%)         | 0                  | (0%)         | 0              | (0%)         |
| <b>Received Anti-VEGF, Steroid, or Vitrectomy for Conditions Other Than DR or DME, N (%)</b> | <b>1</b>              | <b>(2%)</b>  | <b>0</b>          | <b>(0%)</b>  | <b>0</b>           | <b>(0%)</b>  | <b>1</b>       | <b>(7%)</b>  |
| <b>Severe and Very Severe NPDR (Level 53)</b>                                                |                       |              |                   |              |                    |              |                |              |
| <b>No. of Eyes</b>                                                                           | <b>102</b>            |              | <b>42</b>         |              | <b>84</b>          |              | <b>60</b>      |              |
| <b>Received Treatment for DR or DME, N (%)</b>                                               | <b>29</b>             | <b>(28%)</b> | <b>13</b>         | <b>(31%)</b> | <b>26</b>          | <b>(31%)</b> | <b>16</b>      | <b>(27%)</b> |
| <b>Received Treatment for DR, N (%)</b>                                                      | <b>17</b>             | <b>(17%)</b> | <b>11</b>         | <b>(26%)</b> | <b>14</b>          | <b>(17%)</b> | <b>14</b>      | <b>(23%)</b> |
| PRP                                                                                          | 5                     | (5%)         | 9                 | (21%)        | 7                  | (8%)         | 7              | (12%)        |
| Anti-VEGF                                                                                    | 14                    | (14%)        | 5                 | (12%)        | 10                 | (12%)        | 9              | (15%)        |
| Steroid                                                                                      | 0                     | (0%)         | 0                 | (0%)         | 0                  | (0%)         | 0              | (0%)         |
| Vitrectomy                                                                                   | 0                     | (0%)         | 1                 | (2%)         | 0                  | (0%)         | 1              | (2%)         |
| Other                                                                                        | 0                     | (0%)         | 0                 | (0%)         | 0                  | (0%)         | 0              | (0%)         |
| <b>Received Treatment for DME, N (%)</b>                                                     | <b>23</b>             | <b>(23%)</b> | <b>8</b>          | <b>(19%)</b> | <b>21</b>          | <b>(25%)</b> | <b>10</b>      | <b>(17%)</b> |
| Focal Laser                                                                                  | 7                     | (7%)         | 4                 | (10%)        | 8                  | (10%)        | 3              | (5%)         |
| Anti-VEGF                                                                                    | 19                    | (19%)        | 5                 | (12%)        | 17                 | (20%)        | 7              | (12%)        |
| Steroid                                                                                      | 0                     | (0%)         | 0                 | (0%)         | 0                  | (0%)         | 0              | (0%)         |
| Vitrectomy                                                                                   | 0                     | (0%)         | 0                 | (0%)         | 0                  | (0%)         | 0              | (0%)         |
| Other                                                                                        | 0                     | (0%)         | 0                 | (0%)         | 0                  | (0%)         | 0              | (0%)         |
| <b>Received Anti-VEGF, Steroid, or Vitrectomy for Conditions Other Than DR or DME, N (%)</b> | <b>3</b>              | <b>(3%)</b>  | <b>1</b>          | <b>(2%)</b>  | <b>2</b>           | <b>(2%)</b>  | <b>2</b>       | <b>(3%)</b>  |

<sup>a</sup> One eye (without color-PPL and with FA-PPL) received topical steroid and Acular for presumed CME, and another eye (with color-PPL and without FA-PPL) received Bromfenac drops.

<sup>b</sup> Indications include central retinal vein occlusion, vitreous hemorrhage, neovascular age-related macular degeneration, and choroidal neovascularization secondary to age-related macular degeneration.

**eTable 6.** Initial event for eyes meeting the primary outcome

| Events <sup>a</sup>                                   | By Baseline Color-PPL |               |                   |               | By Baseline FA-PPL |               |                |               |
|-------------------------------------------------------|-----------------------|---------------|-------------------|---------------|--------------------|---------------|----------------|---------------|
|                                                       | Color-PPL Absent      |               | Color-PPL Present |               | FA-PPL Absent      |               | FA-PPL Present |               |
| <b>No. of Eyes</b>                                    | <b>323</b>            |               | <b>221</b>        |               | <b>295</b>         |               | <b>247</b>     |               |
| <b>No. of Eyes Meeting the Primary Outcome, N (%)</b> | <b>111</b>            | <b>(100%)</b> | <b>71</b>         | <b>(100%)</b> | <b>71</b>          | <b>(100%)</b> | <b>111</b>     | <b>(100%)</b> |
| Two or more step DRSS worsening                       | 97                    | (87%)         | 65                | (92%)         | 57                 | (80%)         | 105            | (95%)         |
| Receipt of DR treatment                               | 14                    | (13%)         | 6                 | (8%)          | 14                 | (20%)         | 6              | (5%)          |
| <b>No. of Eyes Censored, N (%)</b>                    | <b>212</b>            | <b>(100%)</b> | <b>150</b>        | <b>(100%)</b> | <b>224</b>         | <b>(100%)</b> | <b>136</b>     | <b>(100%)</b> |
| Completed study <sup>b</sup>                          | 118                   | (56%)         | 104               | (69%)         | 127                | (57%)         | 95             | (70%)         |
| Received non-DR treatment                             | 22                    | (10%)         | 5                 | (3%)          | 24                 | (11%)         | 2              | (1%)          |
| Lost to follow-up                                     | 72                    | (34%)         | 41                | (27%)         | 73                 | (33%)         | 39             | (29%)         |

<sup>a</sup> Defined as the initial event that categorized whether an eye met the primary outcome or was being censored.

<sup>b</sup> Eyes that completed 4-year follow-up without meeting the primary outcome or receiving non-DR treatment were censored at the 4-year visit.



**eTable 7.** Sensitivity Analyses of Primary Outcome: DRSS worsening by 2 or more steps within the ETDRS fields on masked UWF-color images or receipt of DR treatment through 4 years by Color-PPL

| Competing-risk Analysis <sup>a</sup>                                                                                               |                                         |                                                           |
|------------------------------------------------------------------------------------------------------------------------------------|-----------------------------------------|-----------------------------------------------------------|
|                                                                                                                                    | Cumulative Incidence Estimates (95% CI) | Hazard Ratio (95% CI) from Subdistribution Hazard Model   |
| <b>Outcome Event:</b><br>≥2-step DRSS worsening on masked UWF-color images or receipt of DR treatment                              |                                         |                                                           |
| <b>By Baseline Color-PPL</b>                                                                                                       |                                         |                                                           |
| PPL Absent                                                                                                                         | 41% (35%, 46%)                          | - Reference -                                             |
| PPL Present                                                                                                                        | 37% (30%, 44%)                          | 0.81 (0.60, 1.11)<br>P = .19                              |
| <b>By Baseline DRSS Level</b>                                                                                                      |                                         |                                                           |
| Mild NPDR (Level 35)                                                                                                               | 45% (37%, 53%)                          |                                                           |
| Moderate NPDR (Level 43)                                                                                                           | 39% (31%, 48%)                          |                                                           |
| Moderately Severe NPDR (Level 47)                                                                                                  | 24% (15%, 35%)                          |                                                           |
| Severe and Very Severe NPDR (Level 53)                                                                                             | 40% (31%, 49%)                          |                                                           |
| <b>Competing Event:</b><br>Receipt of non-DR treatment (for DME or other conditions)                                               |                                         |                                                           |
| <b>By Baseline Color-PPL</b>                                                                                                       |                                         |                                                           |
| PPL Absent                                                                                                                         | 7.8% (5.1%, 11%)                        | - Reference -                                             |
| PPL Present                                                                                                                        | 2.6% (1.0%, 5.5%)                       | 0.42 (0.16, 1.13)<br>P = .08                              |
| <b>By Baseline DRSS Level</b>                                                                                                      |                                         |                                                           |
| Mild NPDR (Level 35)                                                                                                               | 1.3% (0.3%, 4.3%)                       |                                                           |
| Moderate NPDR (Level 43)                                                                                                           | 5.3% (2.4%, 10%)                        |                                                           |
| Moderately Severe NPDR (Level 47)                                                                                                  | 9.7% (4.2%, 18%)                        |                                                           |
| Severe and Very Severe NPDR (Level 53)                                                                                             | 9.0% (4.8%, 15%)                        |                                                           |
| <b>Combined Outcome: ≥2-step DRSS worsening on masked UWF-color images or receipt of treatment for any conditions <sup>b</sup></b> |                                         |                                                           |
|                                                                                                                                    | Kaplan-Meier Estimates (95% CI)         | Hazard Ratio (95% CI) from Cox Proportional Hazards Model |
| <b>By Baseline Color-PPL</b>                                                                                                       |                                         |                                                           |
| PPL Absent                                                                                                                         | 48% (43%, 55%)                          | - Reference -                                             |
| PPL Present                                                                                                                        | 39% (33%, 47%)                          | 0.73 (0.54, 0.98)<br>P = .04                              |
| <b>By Baseline DRSS Level</b>                                                                                                      |                                         |                                                           |
| Mild NPDR (Level 35)                                                                                                               | 46% (38%, 55%)                          |                                                           |
| Moderate NPDR (Level 43)                                                                                                           | 45% (36%, 54%)                          |                                                           |
| Moderately Severe NPDR (Level 47)                                                                                                  | 34% (24%, 46%)                          |                                                           |
| Severe and Very Severe NPDR (Level 53)                                                                                             | 49% (41%, 59%)                          |                                                           |
| <b>Inverse Probability Weighted Analysis <sup>c</sup></b>                                                                          |                                         |                                                           |
|                                                                                                                                    |                                         | Hazard Ratio (95% CI) from IPW Cox Model                  |
| <b>By Baseline Color-PPL</b>                                                                                                       |                                         |                                                           |
| PPL Absent                                                                                                                         |                                         | - Reference -                                             |
| PPL Present                                                                                                                        |                                         | 0.92 (0.67, 1.28)<br>P = .64                              |

<sup>a</sup> Eyes receiving treatment with anti-VEGF, steroid, or vitrectomy for conditions other than DR were treated as experiencing a competing event. Eyes lost to follow-up or completing the visit without experiencing an outcome event (either ≥2-step DRSS worsening or DR treatment) or a competing event were censored at the last completed visit. The Fine-Gray subdistribution hazard model was adjusted for baseline ETDRS-DRSS level within the ETDRS fields on UWF-color images and the correlation between the two study eyes from the same participant.

<sup>b</sup> The Cox proportional hazards model was adjusted for baseline ETDRS-DRSS level within the ETDRS fields on UWF-color images and the correlation between the two study eyes from the same participant. Eyes receiving treatment with anti-VEGF, steroid, or vitrectomy for any conditions (including DR or DME treatment) were considered an outcome event.

<sup>c</sup> The IPW Cox model was adjusted for the correlation between the two study eyes from the same participant, weighted by the product of an estimated time-fixed inverse probability PPL weight and an estimated time-varying inverse probability censoring weight for each eye at each time point. Eyes receiving treatment with anti-VEGF, steroid, or vitrectomy for DR were considered an outcome event. The time-fixed PPL weight was derived from a logistic regression model with baseline color-PPL status as the dependent variable and potential baseline confounders (including age, diabetes type, diabetes duration, HbA1c, estimated glomerular filtration rate, albumin creatinine ratio, and DRSS level on masked UWF-color images) as the independent variables. Potential baseline confounders for the primary outcomes were selected based on a criterion of  $\geq 10\%$  difference in the Kaplan-Meier estimates between groups as shown in eTable 6 in Silva et al 2022 [Submitted]. The time-varying inverse probability censoring weight was obtained from a pooled logistic regression model with censoring as the dependent variable and color-PPL, time and baseline variables associated with censoring (including diabetes type, body mass index, insulin use, smoking, metformin use, estimated glomerular filtration rate, albumin creatinine ratio, and DRSS level on masked UWF-color images; eTable 9) as the independent variables. Baseline risk factors for censoring were selected based on a criterion of  $\geq 10\%$  difference in censoring between groups.

**eTable 8.** Sensitivity Analyses of Primary Outcome: DRSS worsening by 2 or more steps within the ETDRS fields on masked UWF-color images or receipt of DR treatment through 4 years by FA-PPL

| <b>Competing-risk Analysis <sup>a</sup></b>                                                                                   |                                                |                                                                      |
|-------------------------------------------------------------------------------------------------------------------------------|------------------------------------------------|----------------------------------------------------------------------|
|                                                                                                                               | <b>Cumulative Incidence Estimates (95% CI)</b> | <b>Hazard Ratio (95% CI) from Subdistribution Hazard Model</b>       |
| <b>Outcome Event:<br/>≥2-step worsening on masked UWF-color images or receipt of DR treatment</b>                             |                                                |                                                                      |
| <b>By Baseline FA-PPL</b>                                                                                                     |                                                |                                                                      |
| FA-PPL Absent                                                                                                                 | 29% (24%, 35%)                                 | - Reference -                                                        |
| FA-PPL Present                                                                                                                | 50% (43%, 56%)                                 | 1.72 (1.25, 2.36)<br>P < .001                                        |
| <b>Competing Event:<br/>Receipt of non-DR treatment (for DME or other conditions)</b>                                         |                                                |                                                                      |
| <b>By Baseline FA-PPL</b>                                                                                                     |                                                |                                                                      |
| FA-PPL Absent                                                                                                                 | 9.7% (6.4%, 14%)                               | - Reference -                                                        |
| FA-PPL Present                                                                                                                | 0.9% (0.2%, 2.9%)                              | 0.10 (0.02, 0.47)<br>P = .003                                        |
| <b>Combined Outcome: ≥2-step worsening on masked UWF-color images or receipt of treatment for any conditions <sup>b</sup></b> |                                                |                                                                      |
|                                                                                                                               | <b>Kaplan-Meier Estimates (95% CI)</b>         | <b>Hazard Ratio (95% CI) from Cox Proportional Hazards Model</b>     |
| <b>By Baseline FA-PPL</b>                                                                                                     |                                                |                                                                      |
| FA-PPL Absent                                                                                                                 | 39% (33%, 46%)                                 | - Reference -                                                        |
| FA-PPL Present                                                                                                                | 51% (44%, 57%)                                 | 1.34 (1.00, 1.78)<br>P = .05                                         |
| <b>Inverse Probability Weighted Analysis <sup>c</sup></b>                                                                     |                                                |                                                                      |
|                                                                                                                               |                                                | <b>Hazard Ratio (95% CI) from IPW Cox Proportional Hazards Model</b> |
| <b>By Baseline FA-PPL</b>                                                                                                     |                                                |                                                                      |
| FA-PPL Absent                                                                                                                 |                                                | - Reference -                                                        |
| FA-PPL Present                                                                                                                |                                                | 2.10 (1.50, 2.95)<br>P < .001                                        |

<sup>a</sup> Eyes receiving treatment with anti-VEGF, steroid, or vitrectomy for conditions other than DR were treated as experiencing a competing event. Eyes lost to follow-up or completing the visit without experiencing an outcome event (either ≥2-step DRSS worsening or DR treatment) or a competing event were censored at the last completed visit. The Fine-Gray subdistribution hazard model was adjusted for baseline ETDRS-DRSS level within the ETDRS fields on UWF-color images and the correlation between the two study eyes from the same participant.

<sup>b</sup> The Cox proportional hazards model was adjusted for ETDRS-DRSS level within the ETDRS fields on UWF-color images and the correlation between the two study eyes from the same participant. Eyes receiving treatment with anti-VEGF, steroid, or vitrectomy for any conditions (including DR or DME treatment) were considered an outcome event.

<sup>c</sup> The IPW Cox model was adjusted for the correlation between the two study eyes from the same participant, weighted by the product of an estimated time-fixed inverse probability PPL weight and an estimated time-varying inverse probability censoring weight for each eye at each time point. Eyes receiving treatment with anti-VEGF, steroid, or vitrectomy for DR were considered an outcome event. The time-fixed PPL weight was derived from a logistic regression model with baseline FA-PPL status as the dependent variable and potential baseline confounders (including age, diabetes type, diabetes duration, HbA1c, estimated glomerular filtration rate, albumin creatinine ratio, and DRSS level on masked UWF-color images) as the independent variables. Potential baseline confounders for the primary outcomes were selected based on a criterion of ≥10% difference in the Kaplan-Meier estimates between groups as shown in eTable 6 in Silva et al 2022 [Submitted]. The time-varying inverse probability censoring weight was obtained from a pooled logistic regression model with censoring as the dependent variable and color-PPL, time and baseline variables associated with censoring (including diabetes type, body mass index, insulin use, smoking, metformin use, estimated glomerular filtration rate, albumin creatinine ratio, and DRSS level on masked UWF-color images; eTable 9) as the independent variables. Baseline risk factors for censoring were selected based on a criterion of ≥10% difference in censoring between groups.

**eTable 9.** Receipt of Treatment for Non-DR Conditions or Lost to Follow-up by Baseline Characteristics

|                                                  | Total | Received Non-DR Treatment or Lost to Follow-up |       |
|--------------------------------------------------|-------|------------------------------------------------|-------|
| <b>No. of Eyes, N (%)</b>                        | 544   | 140                                            | (26%) |
| <b>Participant Characteristics</b>               |       |                                                |       |
| <b>Gender</b>                                    |       |                                                |       |
| Female                                           | 264   | 73                                             | (28%) |
| Male                                             | 280   | 67                                             | (24%) |
| <b>Age (years)</b>                               |       |                                                |       |
| <60                                              | 227   | 58                                             | (26%) |
| ≥60                                              | 317   | 82                                             | (26%) |
| <b>Race/Ethnicity, N (%)<sup>a</sup></b>         |       |                                                |       |
| White                                            | 373   | 87                                             | (23%) |
| Non-white                                        | 165   | 52                                             | (32%) |
| <b>Diabetes Type, N (%)<sup>b</sup></b>          |       |                                                |       |
| Type 1                                           | 82    | 11                                             | (13%) |
| Type 2                                           | 456   | 125                                            | (27%) |
| <b>Duration of Diabetes (years)</b>              |       |                                                |       |
| <20                                              | 259   | 76                                             | (29%) |
| ≥20                                              | 285   | 64                                             | (22%) |
| <b>Body Mass Index (%)</b>                       |       |                                                |       |
| <30                                              | 200   | 52                                             | (26%) |
| ≥30                                              | 303   | 70                                             | (23%) |
| Unknown                                          | 41    | 18                                             | (44%) |
| <b>Hemoglobin A<sub>1c</sub> (%)<sup>c</sup></b> |       |                                                |       |
| <8.0                                             | 264   | 59                                             | (22%) |
| ≥8.0                                             | 273   | 79                                             | (29%) |
| <b>Insulin Used</b>                              |       |                                                |       |
| No                                               | 142   | 48                                             | (34%) |
| Yes                                              | 402   | 92                                             | (23%) |
| <b>Smoking Status</b>                            |       |                                                |       |
| Current                                          | 54    | 19                                             | (35%) |
| Never                                            | 346   | 85                                             | (25%) |
| Prior                                            | 144   | 36                                             | (25%) |
| <b>Mean Arterial Pressure (mmHg)</b>             |       |                                                |       |
| <97                                              | 265   | 71                                             | (27%) |
| ≥97                                              | 279   | 69                                             | (25%) |
| <b>History of Hypertension</b>                   |       |                                                |       |
| No                                               | 125   | 35                                             | (28%) |
| Yes                                              | 419   | 105                                            | (25%) |
| <b>History of High Cholesterol/Dyslipidemia</b>  |       |                                                |       |
| No                                               | 172   | 39                                             | (23%) |
| Yes                                              | 372   | 101                                            | (27%) |
| <b>Taking Fenofibrate at Baseline</b>            |       |                                                |       |
| No                                               | 522   | 131                                            | (25%) |
| Yes                                              | 22    | 9                                              | (41%) |
| <b>Taking Metformin at Baseline</b>              |       |                                                |       |
| No                                               | 280   | 70                                             | (25%) |

|                                                                          | Total | Received Non-DR Treatment or Lost to Follow-up |       |
|--------------------------------------------------------------------------|-------|------------------------------------------------|-------|
| <b>No. of Eyes, N (%)</b>                                                | 544   | 140                                            | (26%) |
| Yes                                                                      | 246   | 60                                             | (24%) |
| Unknown                                                                  | 18    | 10                                             | (56%) |
| <b>EGFR (mL/min/1.73 m<sup>2</sup>)</b>                                  |       |                                                |       |
| < 60                                                                     | 66    | 21                                             | (32%) |
| ≥ 60                                                                     | 249   | 50                                             | (20%) |
| Unknown                                                                  | 229   | 69                                             | (30%) |
| <b>Albumin Creatinine Ratio</b>                                          |       |                                                |       |
| No albuminuria (<30)                                                     | 179   | 33                                             | (18%) |
| Albuminuria (30-300)                                                     | 133   | 40                                             | (30%) |
| Unknown                                                                  | 232   | 67                                             | (29%) |
| <b>Number of Study Eyes</b>                                              |       |                                                |       |
| 1                                                                        | 190   | 52                                             | (27%) |
| 2                                                                        | 354   | 88                                             | (25%) |
| <b>Study Eye Characteristics</b>                                         |       |                                                |       |
| <b>Visual Acuity Letter Score</b>                                        |       |                                                |       |
| < 84 (20/25 or worse)                                                    | 204   | 62                                             | (30%) |
| ≥ 84 (20/20 or better)                                                   | 340   | 78                                             | (23%) |
| <b>DRSS Level on UWF Masked Color Image by Reading Center Assessment</b> |       |                                                |       |
| Mild NPDR (Level 35)                                                     | 172   | 35                                             | (20%) |
| Moderate NPDR (Level 43)                                                 | 149   | 35                                             | (23%) |
| Moderately Severe NPDR (Level 47)                                        | 79    | 23                                             | (29%) |
| Severe and Very Severe NPDR (Level 53)                                   | 144   | 47                                             | (33%) |
| <b>OCT CST Spectralis Equivalent (μm)<sup>d</sup></b>                    |       |                                                |       |
| < 210                                                                    | 258   | 71                                             | (28%) |
| ≥ 210                                                                    | 286   | 69                                             | (24%) |
| <b>OCT Volume (mm<sup>2</sup>)<sup>e</sup></b>                           |       |                                                |       |
| < 7.0                                                                    | 289   | 64                                             | (22%) |
| ≥ 7.0                                                                    | 255   | 76                                             | (30%) |
| <b>Lens Status</b>                                                       |       |                                                |       |
| Aphakic or PC IOL                                                        | 135   | 32                                             | (24%) |
| Phakic                                                                   | 409   | 108                                            | (26%) |
| <b>History of DME Treatment</b>                                          |       |                                                |       |
| No                                                                       | 425   | 117                                            | (28%) |
| Yes                                                                      | 119   | 23                                             | (19%) |

<sup>a</sup> Excluding 6 eyes with unknown race/ethnicity

<sup>b</sup> Excluding 6 eyes with uncertain type

<sup>c</sup> Excluding 7 eyes with unavailable hbA1c

<sup>d</sup> Cirrus measurements were converted to Spectralis equivalents using the following formula: Spectralis = 40.78 + 0.95 × Cirrus.

<sup>e</sup> Retinal volume measurements were converted to Stratus equivalents using the following formulae: Stratus = -1.21 + 1.02 × Cirrus; Stratus = -2.05 + 1.06 × Spectralis.

**eTable 10.** Primary Outcome: DR worsening by 2 or more steps within the ETDRS fields on UWF-color images or receipt of DR treatment through 4 years by baseline DRSS level and PPL characteristics

| Primary Outcome <sup>a</sup>                                  | No. of Eyes | Kaplan-Meier Estimates (95% CI) | Hazard Ratio (95% CI)                  | P Value <sup>b</sup> |
|---------------------------------------------------------------|-------------|---------------------------------|----------------------------------------|----------------------|
| <b>By Baseline DRSS Level</b>                                 |             |                                 |                                        |                      |
| <b>DRSS level within the ETDRS fields on UWF-color images</b> |             |                                 |                                        |                      |
| Mild NPDR (Level 35)                                          | 172         | 45% (37%, 54%)                  | --                                     | --                   |
| Moderate NPDR (Level 43)                                      | 149         | 40% (32%, 49%)                  | --                                     |                      |
| Moderately Severe NPDR (Level 47)                             | 79          | 26% (17%, 38%)                  | --                                     |                      |
| Severe and Very Severe NPDR (Level 53)                        | 144         | 43% (34%, 53%)                  | --                                     |                      |
| <b>Baseline Color-PPL Risk Factors</b>                        |             |                                 |                                        |                      |
| <b>Primary: Color-PPL Status</b>                              |             |                                 |                                        |                      |
| PPL Absent                                                    | 323         | 43% (37%, 49%)                  | - Reference -                          | .13                  |
| PPL Present                                                   | 221         | 38% (31%, 45%)                  | 0.78 (0.57, 1.08)                      |                      |
| <b>Color-PPL Status for H/Ma</b>                              |             |                                 |                                        |                      |
| PPL Absent                                                    | 361         | 42% (36%, 48%)                  | - Reference -                          | --                   |
| PPL Present                                                   | 180         | 37% (30%, 46%)                  | 0.80 (0.56, 1.13)                      |                      |
| <b>Color-PPL Status for IRMA</b>                              |             |                                 |                                        |                      |
| PPL Absent                                                    | 448         | 40% (35%, 46%)                  | - Reference -                          | --                   |
| PPL Present                                                   | 84          | 35% (25%, 47%)                  | 0.81 (0.54, 1.22)                      |                      |
| <b>Color-PPL Status for VB</b>                                |             |                                 |                                        |                      |
| PPL Absent                                                    | 533         | 40% (36%, 45%)                  | --                                     | --                   |
| PPL Present                                                   | 5           | 40% (12%, 87%)                  | --                                     |                      |
| <b>Color-PPL Status for NVE</b>                               |             |                                 |                                        |                      |
| PPL Absent                                                    | 536         | 40% (36%, 45%)                  | --                                     | --                   |
| PPL Present                                                   | 8           | 57% (27%, 90%)                  | --                                     |                      |
| <b>Number of peripheral fields with Color-PPL</b>             |             |                                 |                                        |                      |
| No PPL                                                        | 323         | 43% (37%, 49%)                  | Per unit increase in number of fields: | --                   |
| PPL in 1 Field                                                | 118         | 39% (30%, 49%)                  | 0.88 (0.75, 1.03)                      |                      |
| PPL in ≥2 Fields                                              | 103         | 36% (27%, 47%)                  |                                        |                      |
| <b>Color-PPL Status in Field 3</b>                            |             |                                 |                                        |                      |
| PPL Absent                                                    | 448         | 42% (37%, 47%)                  | - Reference -                          | --                   |
| PPL Present                                                   | 89          | 35% (25%, 47%)                  | 0.72 (0.47, 1.10)                      |                      |
| <b>Color-PPL Status in Field 4</b>                            |             |                                 |                                        |                      |
| PPL Absent                                                    | 442         | 42% (37%, 47%)                  | - Reference -                          | --                   |
| PPL Present                                                   | 93          | 32% (23%, 43%)                  | 0.65 (0.43, 1.00)                      |                      |
| <b>Color-PPL Status in Field 5</b>                            |             |                                 |                                        |                      |
| PPL Absent                                                    | 453         | 40% (35%, 45%)                  | - Reference -                          | --                   |
| PPL Present                                                   | 74          | 39% (28%, 52%)                  | 0.88 (0.55, 1.38)                      |                      |
| <b>Color-PPL Status in Field 6</b>                            |             |                                 |                                        |                      |
| PPL Absent                                                    | 450         | 41% (36%, 46%)                  | - Reference -                          | --                   |
| PPL Present                                                   | 85          | 37% (27%, 49%)                  | 0.82 (0.54, 1.25)                      |                      |
| <b>Color-PPL Status in Field 7</b>                            |             |                                 |                                        |                      |
| PPL Absent                                                    | 440         | 40% (35%, 45%)                  | - Reference -                          | --                   |
| PPL Present                                                   | 58          | 40% (27%, 55%)                  | 0.98 (0.61, 1.59)                      |                      |
| <b>Baseline FA-PPL Risk Factors</b>                           |             |                                 |                                        |                      |
| <b>Primary: FA-PPL Status</b>                                 |             |                                 |                                        |                      |
| PPL Absent                                                    | 295         | 31% (25%, 38%)                  | - Reference -                          | <.001                |
| PPL Present                                                   | 247         | 50% (44%, 57%)                  | 1.72 (1.25, 2.36)                      |                      |
| <b>FA-PPL Status for H/Ma</b>                                 |             |                                 |                                        |                      |
| PPL Absent                                                    | 317         | 33% (28%, 40%)                  | - Reference -                          | .02                  |

| Primary Outcome <sup>a</sup>                   | No. of Eyes | Kaplan-Meier Estimates (95% CI) | Hazard Ratio (95% CI)                  | P Value <sup>b</sup> |
|------------------------------------------------|-------------|---------------------------------|----------------------------------------|----------------------|
| PPL Present                                    | 225         | 49% (42%, 56%)                  | 1.47 (1.08, 2.01)                      |                      |
| <b>FA-PPL Status for IRMA</b>                  |             |                                 |                                        |                      |
| PPL Absent                                     | 430         | 37% (33%, 43%)                  | - Reference -                          | .04                  |
| PPL Present                                    | 112         | 51% (41%, 61%)                  | 1.39 (1.02, 1.90)                      |                      |
| <b>FA-PPL Status for VB</b>                    |             |                                 |                                        |                      |
| PPL Absent                                     | 538         | 40% (36%, 45%)                  | --                                     | --                   |
| PPL Present                                    | 4           | 67% (23%, 99%)                  | --                                     |                      |
| <b>FA-PPL Status for NVE</b>                   |             |                                 |                                        |                      |
| PPL Absent                                     | 512         | 40% (35%, 45%)                  | - Reference -                          | .07                  |
| PPL Present                                    | 30          | 54% (37%, 72%)                  | 1.68 (0.97, 2.91)                      |                      |
| <b>Number of peripheral fields with FA-PPL</b> |             |                                 |                                        |                      |
| No PPL                                         | 295         | 31% (25%, 38%)                  | Per unit increase in number of fields: | .64                  |
| PPL in 1 Field                                 | 75          | 65% (54%, 76%)                  | 1.02 (0.94, 1.11)                      |                      |
| PPL in ≥2 Fields                               | 172         | 43% (35%, 51%)                  |                                        |                      |
| <b>FA-PPL Status in Field 3</b>                |             |                                 |                                        |                      |
| PPL Absent                                     | 406         | 39% (34%, 45%)                  | - Reference -                          | .40                  |
| PPL Present                                    | 136         | 44% (36%, 53%)                  | 1.15 (0.83, 1.60)                      |                      |
| <b>FA-PPL Status in Field 4</b>                |             |                                 |                                        |                      |
| PPL Absent                                     | 386         | 40% (35%, 46%)                  | - Reference -                          | .51                  |
| PPL Present                                    | 156         | 41% (33%, 49%)                  | 0.90 (0.65, 1.24)                      |                      |
| <b>FA-PPL Status in Field 5</b>                |             |                                 |                                        |                      |
| PPL Absent                                     | 435         | 41% (36%, 46%)                  | - Reference -                          | .61                  |
| PPL Present                                    | 107         | 41% (31%, 51%)                  | 0.91 (0.63, 1.31)                      |                      |
| <b>FA-PPL Status in Field 6</b>                |             |                                 |                                        |                      |
| PPL Absent                                     | 379         | 37% (32%, 42%)                  | - Reference -                          | .07                  |
| PPL Present                                    | 163         | 48% (40%, 57%)                  | 1.33 (0.97, 1.82)                      |                      |
| <b>FA-PPL Status in Field 7</b>                |             |                                 |                                        |                      |
| PPL Absent                                     | 437         | 40% (35%, 45%)                  | - Reference -                          | .80                  |
| PPL Present                                    | 105         | 43% (33%, 54%)                  | 1.05 (0.72, 1.52)                      |                      |

<sup>a</sup> Eyes receiving treatment with anti-VEGF, steroid, or vitrectomy for conditions other than DR were censored after treatment initiation. The Cox proportional hazards analysis was conducted only if there were at least 20 eyes in each stratum for the risk factor. The model was adjusted for baseline ETDRS-DRSS level within the ETDRS fields on UWF-color images and the correlation between the two study eyes from the same participant.

<sup>b</sup> P value was reported only if the analysis of primary PPL showed a significant effect (i.e.,  $P < 0.05$ ).

**eTable 11.** Secondary Outcome: Development of PDR within the ETDRS fields on masked UWF-color images or receipt of DR treatment through 4 years by baseline DRSS level and PPL characteristics

| Risk Factors <sup>a</sup>                                     | No. of Eyes | Kaplan-Meier Estimates (95% CI) | Hazard Ratio (95% CI)                  | P Value <sup>b</sup> |
|---------------------------------------------------------------|-------------|---------------------------------|----------------------------------------|----------------------|
| <b>By Baseline DRSS Level</b>                                 |             |                                 |                                        |                      |
| <b>DRSS level within the ETDRS fields on UWF-color images</b> |             |                                 |                                        |                      |
| Mild NPDR (Level 35)                                          | 172         | 10% (6.2%, 17%)                 | --                                     | --                   |
| Moderate NPDR (Level 43)                                      | 149         | 16% (10%, 23%)                  | --                                     |                      |
| Moderately Severe NPDR (Level 47)                             | 79          | 26% (17%, 38%)                  | --                                     |                      |
| Severe and Very Severe NPDR (Level 53)                        | 144         | 43% (34%, 53%)                  | --                                     |                      |
| <b>By Baseline Color-PPL Characteristics</b>                  |             |                                 |                                        |                      |
| <b>Primary: Color-PPL Status</b>                              |             |                                 |                                        |                      |
| PPL Absent                                                    | 323         | 26% (21%, 32%)                  | - Reference -                          | .67                  |
| PPL Present                                                   | 221         | 17% (12%, 23%)                  | 0.90 (0.57, 1.44)                      |                      |
| <b>Color-PPL Status for H/Ma</b>                              |             |                                 |                                        |                      |
| PPL Absent                                                    | 361         | 26% (21%, 31%)                  | - Reference -                          | --                   |
| PPL Present                                                   | 180         | 16% (11%, 22%)                  | 0.92 (0.54, 1.58)                      |                      |
| <b>Color-PPL Status for IRMA</b>                              |             |                                 |                                        |                      |
| PPL Absent                                                    | 448         | 23% (19%, 28%)                  | - Reference -                          | --                   |
| PPL Present                                                   | 84          | 17% (10%, 28%)                  | 0.82 (0.45, 1.50)                      |                      |
| <b>Color-PPL Status for VB</b>                                |             |                                 |                                        |                      |
| PPL Absent                                                    | 533         | 22% (18%, 26%)                  | --                                     | --                   |
| PPL Present                                                   | 5           | 40% (12%, 87%)                  | --                                     |                      |
| <b>Color-PPL Status for NVE</b>                               |             |                                 |                                        |                      |
| PPL Absent                                                    | 536         | 22% (18%, 26%)                  | --                                     | --                   |
| PPL Present                                                   | 8           | 57% (27%, 90%)                  | --                                     |                      |
| <b>Number of peripheral fields with Color-PPL</b>             |             |                                 |                                        |                      |
| No PPL                                                        | 323         | 26% (21%, 32%)                  | Per unit increase in number of fields: | --                   |
| PPL in 1 Field                                                | 118         | 20% (13%, 29%)                  | 0.91 (0.70, 1.18)                      |                      |
| PPL in ≥2 Fields                                              | 103         | 14% (7.9%, 23%)                 |                                        |                      |
| <b>Color-PPL Status in Field 3</b>                            |             |                                 |                                        |                      |
| PPL Absent                                                    | 448         | 25% (21%, 30%)                  | - Reference -                          | --                   |
| PPL Present                                                   | 89          | 11% (5.4%, 20%)                 | 0.61 (0.29, 1.26)                      |                      |
| <b>Color-PPL Status in Field 4</b>                            |             |                                 |                                        |                      |
| PPL Absent                                                    | 442         | 25% (21%, 30%)                  | - Reference -                          | --                   |
| PPL Present                                                   | 93          | 11% (5.9%, 20%)                 | 0.61 (0.30, 1.23)                      |                      |
| <b>Color-PPL Status in Field 5</b>                            |             |                                 |                                        |                      |
| PPL Absent                                                    | 453         | 23% (19%, 28%)                  | - Reference -                          | --                   |
| PPL Present                                                   | 74          | 17% (10%, 29%)                  | 1.17 (0.58, 2.35)                      |                      |
| <b>Color-PPL Status in Field 6</b>                            |             |                                 |                                        |                      |
| PPL Absent                                                    | 450         | 23% (19%, 28%)                  | - Reference -                          | --                   |
| PPL Present                                                   | 85          | 17% (10%, 28%)                  | 0.96 (0.52, 1.77)                      |                      |
| <b>Color-PPL Status in Field 7</b>                            |             |                                 |                                        |                      |
| PPL Absent                                                    | 440         | 23% (19%, 28%)                  | - Reference -                          | --                   |
| PPL Present                                                   | 58          | 18% (10%, 32%)                  | 1.03 (0.50, 2.15)                      |                      |
| <b>By Baseline FA-PPL Characteristics</b>                     |             |                                 |                                        |                      |



| Risk Factors <sup>a</sup>                      | No. of Eyes | Kaplan-Meier Estimates (95% CI) | Hazard Ratio (95% CI)                  | P Value <sup>b</sup> |
|------------------------------------------------|-------------|---------------------------------|----------------------------------------|----------------------|
| <b>Primary: FA-PPL Status</b>                  |             |                                 |                                        |                      |
| PPL Absent                                     | 295         | 20% (15%, 26%)                  | - Reference -                          | .03                  |
| PPL Present                                    | 247         | 24% (19%, 31%)                  | 1.60 (1.05, 2.45)                      |                      |
| <b>FA-PPL Status for H/Ma</b>                  |             |                                 |                                        |                      |
| PPL Absent                                     | 317         | 23% (18%, 29%)                  | - Reference -                          | .50                  |
| PPL Present                                    | 225         | 21% (16%, 27%)                  | 1.16 (0.75, 1.79)                      |                      |
| <b>FA-PPL Status for IRMA</b>                  |             |                                 |                                        |                      |
| PPL Absent                                     | 430         | 22% (18%, 26%)                  | - Reference -                          | .27                  |
| PPL Present                                    | 112         | 24% (17%, 34%)                  | 1.30 (0.82, 2.07)                      |                      |
| <b>FA-PPL Status for VB</b>                    |             |                                 |                                        |                      |
| PPL Absent                                     | 538         | 22% (18%, 26%)                  | --                                     | --                   |
| PPL Present                                    | 4           | 67% (23%, 99%)                  | --                                     |                      |
| <b>FA-PPL Status for NVE</b>                   |             |                                 |                                        |                      |
| PPL Absent                                     | 512         | 20% (17%, 25%)                  | - Reference -                          | <.001                |
| PPL Present                                    | 30          | 47% (31%, 66%)                  | 3.49 (2.08, 5.85)                      |                      |
| <b>Number of peripheral fields with FA-PPL</b> |             |                                 |                                        |                      |
| No PPL                                         | 295         | 20% (15%, 26%)                  | Per unit increase in number of fields: | .69                  |
| PPL in 1 Field                                 | 75          | 40% (30%, 53%)                  | 0.97 (0.85, 1.11)                      |                      |
| PPL in ≥2 Fields                               | 172         | 17% (12%, 24%)                  |                                        |                      |
| <b>FA-PPL Status in Field 3</b>                |             |                                 |                                        |                      |
| PPL Absent                                     | 406         | 25% (20%, 30%)                  | - Reference -                          | .41                  |
| PPL Present                                    | 136         | 15% (10%, 23%)                  | 0.80 (0.47, 1.36)                      |                      |
| <b>FA-PPL Status in Field 4</b>                |             |                                 |                                        |                      |
| PPL Absent                                     | 386         | 25% (21%, 30%)                  | - Reference -                          | .35                  |
| PPL Present                                    | 156         | 15% (10%, 23%)                  | 0.78 (0.46, 1.32)                      |                      |
| <b>FA-PPL Status in Field 5</b>                |             |                                 |                                        |                      |
| PPL Absent                                     | 435         | 23% (19%, 28%)                  | - Reference -                          | .57                  |
| PPL Present                                    | 107         | 17% (11%, 27%)                  | 0.85 (0.48, 1.49)                      |                      |
| <b>FA-PPL Status in Field 6</b>                |             |                                 |                                        |                      |
| PPL Absent                                     | 379         | 23% (18%, 28%)                  | - Reference -                          | .35                  |
| PPL Present                                    | 163         | 21% (15%, 28%)                  | 1.24 (0.79, 1.96)                      |                      |
| <b>FA-PPL Status in Field 7</b>                |             |                                 |                                        |                      |
| PPL Absent                                     | 437         | 23% (19%, 27%)                  | - Reference -                          | .95                  |
| PPL Present                                    | 105         | 20% (13%, 30%)                  | 0.98 (0.57, 1.68)                      |                      |

<sup>a</sup> Eyes receiving treatment with anti-VEGF, steroid, or vitrectomy for conditions other than DR were censored after treatment initiation. The Cox proportional hazards analysis was conducted only if there were at least 20 eyes in each stratum for the risk factor. *P* values for secondary PPL characteristics were only presented when *P* < 0.05 for primary PPL. The Cox proportional hazards model was adjusted for baseline ETDRS-DRSS level within the ETDRS fields on UWF-color images and the correlation between the two study eyes from the same participant.

<sup>b</sup> *P* value was reported only if the analysis of primary PPL showed a significant effect (i.e., *P* < 0.05).

**eTable 12.** Secondary Outcome: Development of vitreous hemorrhage within the ETDRS fields on masked UWF-color images or at clinical exam or receipt of DR treatment through 4 years by baseline DRSS level and PPL characteristics

| Risk Factors <sup>a</sup>                                     | No. of Eyes | Kaplan-Meier Estimates (95% CI) | Hazard Ratio (95% CI)                 | P Value <sup>b</sup> |
|---------------------------------------------------------------|-------------|---------------------------------|---------------------------------------|----------------------|
| <b>By Baseline DRSS Level</b>                                 |             |                                 |                                       |                      |
| <b>DRSS level within the ETDRS fields on UWF-color images</b> |             |                                 |                                       |                      |
| Mild NPDR (Level 35)                                          | 172         | 4.2% (1.9%, 9.2%)               | --                                    | --                   |
| Moderate NPDR (Level 43)                                      | 149         | 7.1% (3.7%, 13%)                | --                                    |                      |
| Moderately Severe NPDR (Level 47)                             | 79          | 18% (10%, 29%)                  | --                                    |                      |
| Severe and Very Severe NPDR (Level 53)                        | 144         | 22% (15%, 31%)                  | --                                    |                      |
| <b>By Baseline Color-PPL Characteristics</b>                  |             |                                 |                                       |                      |
| <b>Primary: Color-PPL Status</b>                              |             |                                 |                                       |                      |
| PPL Absent                                                    | 323         | 12% (8.8%, 17%)                 | - Reference -                         | .45                  |
| PPL Present                                                   | 221         | 10% (6.6%, 15%)                 | 1.28 (0.67, 2.41)                     |                      |
| <b>Color-PPL Status for H/Ma</b>                              |             |                                 |                                       |                      |
| PPL Absent                                                    | 361         | 12% (8.6%, 16%)                 | - Reference -                         | --                   |
| PPL Present                                                   | 180         | 11% (6.6%, 17%)                 | 1.56 (0.76, 3.23)                     |                      |
| <b>Color-PPL Status for IRMA</b>                              |             |                                 |                                       |                      |
| PPL Absent                                                    | 448         | 12% (8.6%, 15%)                 | - Reference -                         | --                   |
| PPL Present                                                   | 84          | 10% (4.9%, 20%)                 | 1.01 (0.44, 2.32)                     |                      |
| <b>Color-PPL Status for VB</b>                                |             |                                 |                                       |                      |
| PPL Absent                                                    | 533         | 11% (8.6%, 15%)                 | --                                    | --                   |
| PPL Present                                                   | 5           | 20% (3.1%, 80%)                 | --                                    |                      |
| <b>Color-PPL Status for NVE</b>                               |             |                                 |                                       |                      |
| PPL Absent                                                    | 536         | 11% (8.0%, 14%)                 | --                                    | --                   |
| PPL Present                                                   | 8           | 57% (27%, 90%)                  | --                                    |                      |
| <b>Number of peripheral fields with Color-PPL</b>             |             |                                 |                                       |                      |
| No PPL                                                        | 323         | 12% (8.8%, 17%)                 | Per unit increase in number of fields | --                   |
| PPL in 1 Field                                                | 118         | 10% (5.5%, 18%)                 | 1.16 (0.84, 1.59)                     |                      |
| PPL in ≥2 Fields                                              | 103         | 10% (5.5%, 19%)                 |                                       |                      |
| <b>Color-PPL Status in Field 3</b>                            |             |                                 |                                       |                      |
| PPL Absent                                                    | 448         | 12% (9.1%, 16%)                 | - Reference -                         | --                   |
| PPL Present                                                   | 89          | 8.0% (3.7%, 17%)                | 1.07 (0.43, 2.64)                     |                      |
| <b>Color-PPL Status in Field 4</b>                            |             |                                 |                                       |                      |
| PPL Absent                                                    | 442         | 12% (9.4%, 16%)                 | - Reference -                         | --                   |
| PPL Present                                                   | 93          | 7.5% (3.4%, 16%)                | 0.95 (0.38, 2.33)                     |                      |
| <b>Color-PPL Status in Field 5</b>                            |             |                                 |                                       |                      |
| PPL Absent                                                    | 453         | 11% (7.9%, 14%)                 | - Reference -                         | --                   |
| PPL Present                                                   | 74          | 13% (6.6%, 24%)                 | 2.18 (0.90, 5.27)                     |                      |
| <b>Color-PPL Status in Field 6</b>                            |             |                                 |                                       |                      |
| PPL Absent                                                    | 450         | 12% (8.9%, 16%)                 | - Reference -                         | --                   |
| PPL Present                                                   | 85          | 10% (4.9%, 20%)                 | 1.16 (0.51, 2.68)                     |                      |
| <b>Color-PPL Status in Field 7</b>                            |             |                                 |                                       |                      |
| PPL Absent                                                    | 440         | 11% (8.4%, 15%)                 | - Reference -                         | --                   |

| Risk Factors <sup>a</sup>                      | No. of Eyes | Kaplan-Meier Estimates (95% CI) | Hazard Ratio (95% CI)                  | P Value <sup>b</sup> |
|------------------------------------------------|-------------|---------------------------------|----------------------------------------|----------------------|
| PPL Present                                    | 58          | 12% (5.7%, 25%)                 | 1.58 (0.63, 3.99)                      |                      |
| <b>By Baseline FA-PPL Characteristics</b>      |             |                                 |                                        |                      |
| <b>Primary: FA-PPL Status</b>                  |             |                                 |                                        |                      |
| PPL Absent                                     | 295         | 11% (7.6%, 16%)                 | - Reference -                          | .24                  |
| PPL Present                                    | 247         | 12% (7.9%, 17%)                 | 1.43 (0.79, 2.59)                      |                      |
| <b>FA-PPL Status for H/MA</b>                  |             |                                 |                                        |                      |
| PPL Absent                                     | 317         | 13% (9.3%, 18%)                 | - Reference -                          | --                   |
| PPL Present                                    | 225         | 9.3% (5.9%, 14%)                | 0.96 (0.49, 1.89)                      |                      |
| <b>FA-PPL Status for IRMA</b>                  |             |                                 |                                        |                      |
| PPL Absent                                     | 430         | 11% (7.7%, 14%)                 | - Reference -                          | --                   |
| PPL Present                                    | 112         | 14% (8.5%, 23%)                 | 1.70 (0.88, 3.28)                      |                      |
| <b>FA-PPL Status for VB</b>                    |             |                                 |                                        |                      |
| PPL Absent                                     | 538         | 11% (8.3%, 14%)                 | --                                     | --                   |
| PPL Present                                    | 4           | 67% (23%, 99%)                  | --                                     |                      |
| <b>FA-PPL Status for NVE</b>                   |             |                                 |                                        |                      |
| PPL Absent                                     | 512         | 9.8% (7.3%, 13%)                | - Reference -                          | --                   |
| PPL Present                                    | 30          | 34% (20%, 54%)                  | 4.95 (2.52, 9.71)                      |                      |
| <b>Number of peripheral fields with FA-PPL</b> |             |                                 |                                        |                      |
| No PPL                                         | 295         | 11% (7.6%, 16%)                 | Per unit increase in number of fields: | --                   |
| PPL in 1 Field                                 | 75          | 20% (12%, 31%)                  | 0.97 (0.79, 1.19)                      |                      |
| PPL in ≥2 Fields                               | 172         | 7.5% (4.2%, 13%)                |                                        |                      |
| <b>FA-PPL Status in Field 3</b>                |             |                                 |                                        |                      |
| PPL Absent                                     | 406         | 13% (9.6%, 17%)                 | - Reference -                          | --                   |
| PPL Present                                    | 136         | 7.4% (3.9%, 14%)                | 0.79 (0.35, 1.79)                      |                      |
| <b>FA-PPL Status in Field 4</b>                |             |                                 |                                        |                      |
| PPL Absent                                     | 386         | 13% (10%, 18%)                  | - Reference -                          | --                   |
| PPL Present                                    | 156         | 6.6% (3.5%, 12%)                | 0.68 (0.30, 1.52)                      |                      |
| <b>FA-PPL Status in Field 5</b>                |             |                                 |                                        |                      |
| PPL Absent                                     | 435         | 12% (9.3%, 16%)                 | - Reference -                          | --                   |
| PPL Present                                    | 107         | 7.6% (3.7%, 15%)                | 0.76 (0.31, 1.88)                      |                      |
| <b>FA-PPL Status in Field 6</b>                |             |                                 |                                        |                      |
| PPL Absent                                     | 379         | 11% (7.8%, 15%)                 | - Reference -                          | --                   |
| PPL Present                                    | 163         | 12% (7.8%, 19%)                 | 1.60 (0.85, 3.00)                      |                      |
| <b>FA-PPL Status in Field 7</b>                |             |                                 |                                        |                      |
| PPL Absent                                     | 437         | 12% (9.0%, 16%)                 | - Reference -                          | --                   |
| PPL Present                                    | 105         | 8.6% (4.2%, 17%)                | 0.80 (0.33, 1.91)                      |                      |

<sup>a</sup> Eyes receiving treatment with anti-VEGF, steroid, or vitrectomy for conditions other than DR were censored after treatment initiation. The Cox proportional hazards analysis was conducted only if there were at least 20 eyes in each stratum for the risk factor. *P* values for secondary PPL characteristics were only presented when *P* < 0.05 for primary PPL. The Cox proportional hazards model was adjusted for baseline ETDRS-DRSS level within the ETDRS fields on UWF-color images and the correlation between the two study eyes from the same participant.

<sup>b</sup> *P* value was reported only if the analysis of primary PPL showed a significant effect (i.e., *P* < 0.05).

**eTable 13.** Secondary Outcome: DRSS improvement by 2 or more steps within the ETDRS fields on masked UWF-color images through 4 years by baseline DRSS level and PPL characteristics

| Risk Factors <sup>a</sup>                                                                                  | No. of Eyes | Kaplan-Meier Estimates (95% CI) | Hazard Ratio (95% CI)                  | P Value <sup>b</sup> |
|------------------------------------------------------------------------------------------------------------|-------------|---------------------------------|----------------------------------------|----------------------|
| <b>Overall Cohort by Baseline DRSS Level</b>                                                               |             |                                 |                                        |                      |
| <b>DRSS level within the ETDRS fields on UWF-color images</b>                                              |             |                                 |                                        |                      |
| Mild NPDR (Level 35)                                                                                       | 172         | 2.9% (1.1%, 7.6%)               | --                                     | --                   |
| Moderate NPDR (Level 43)                                                                                   | 149         | 1.0% (0.1%, 6.8%)               | --                                     |                      |
| Moderately Severe NPDR (Level 47)                                                                          | 79          | 27% (17%, 41%)                  | --                                     |                      |
| Severe and Very Severe NPDR (Level 53)                                                                     | 144         | 53% (43%, 64%)                  | --                                     |                      |
| <b>Overall Cohort by Color-PPL</b>                                                                         |             |                                 |                                        |                      |
| <b>Primary: Color-PPL Status</b>                                                                           |             |                                 |                                        |                      |
| PPL Absent                                                                                                 | 323         | 21% (16%, 27%)                  | --                                     | --                   |
| PPL Present                                                                                                | 221         | 13% (9.1%, 19%)                 | --                                     |                      |
| <b>By Baseline Color-PPL Characteristics <sup>b</sup><br/>(Moderately Severe to Very Severe NPDR Only)</b> |             |                                 |                                        |                      |
| <b>Primary: Color-PPL Status</b>                                                                           |             |                                 |                                        |                      |
| PPL Absent                                                                                                 | 165         | 39% (31%, 49%)                  | - Reference -                          | .12                  |
| PPL Present                                                                                                | 58          | 56% (40%, 74%)                  | 1.44 (0.91, 2.28)                      |                      |
| <b>Color-PPL Status for H/Ma</b>                                                                           |             |                                 |                                        |                      |
| PPL Absent                                                                                                 | 186         | 39% (31%, 48%)                  | - Reference -                          | --                   |
| PPL Present                                                                                                | 37          | 70% (47%, 89%)                  | 2.19 (1.30, 3.70)                      |                      |
| <b>Color-PPL Status for IRMA</b>                                                                           |             |                                 |                                        |                      |
| PPL Absent                                                                                                 | 196         | 42% (34%, 50%)                  | - Reference -                          | --                   |
| PPL Present                                                                                                | 27          | 60% (37%, 83%)                  | 1.36 (0.75, 2.47)                      |                      |
| <b>Color-PPL Status for VB</b>                                                                             |             |                                 |                                        |                      |
| PPL Absent                                                                                                 | 219         | 44% (36%, 52%)                  | --                                     | --                   |
| PPL Present                                                                                                | 4           | 25% (3.9%, 87%)                 | --                                     |                      |
| <b>Color-PPL Status for NVE</b>                                                                            |             |                                 |                                        |                      |
| PPL Absent                                                                                                 | 219         | 43% (36%, 52%)                  | --                                     | --                   |
| PPL Present                                                                                                | 4           | 33% (5.5%, 95%)                 | --                                     |                      |
| <b>Number of peripheral fields with Color-PPL</b>                                                          |             |                                 |                                        |                      |
| No PPL                                                                                                     | 165         | 39% (31%, 49%)                  | Per unit increase in number of fields: | --                   |
| PPL in 1 Field                                                                                             | 40          | 54% (34%, 75%)                  | 1.31 (0.96, 1.79)                      |                      |
| PPL in ≥2 Fields                                                                                           | 18          | 53% (31%, 79%)                  |                                        |                      |
| <b>Color-PPL Status in Field 3</b>                                                                         |             |                                 |                                        |                      |
| PPL Absent                                                                                                 | 208         | 43% (36%, 52%)                  | --                                     | --                   |
| PPL Present                                                                                                | 14          | 55% (23%, 91%)                  | --                                     |                      |
| <b>Color-PPL Status in Field 4</b>                                                                         |             |                                 |                                        |                      |
| PPL Absent                                                                                                 | 204         | 42% (34%, 51%)                  | --                                     | --                   |
| PPL Present                                                                                                | 18          | 56% (31%, 84%)                  | --                                     |                      |
| <b>Color-PPL Status in Field 5</b>                                                                         |             |                                 |                                        |                      |
| PPL Absent                                                                                                 | 209         | 41% (34%, 50%)                  | --                                     | --                   |
| PPL Present                                                                                                | 12          | 79% (43%, 99%)                  | --                                     |                      |
| <b>Color-PPL Status in Field 6</b>                                                                         |             |                                 |                                        |                      |
| PPL Absent                                                                                                 | 200         | 43% (35%, 52%)                  | - Reference -                          | --                   |

| Risk Factors <sup>a</sup>                                                                               | No. of Eyes | Kaplan-Meier Estimates (95% CI) | Hazard Ratio (95% CI)                  | P Value <sup>b</sup> |
|---------------------------------------------------------------------------------------------------------|-------------|---------------------------------|----------------------------------------|----------------------|
| PPL Present                                                                                             | 22          | 48% (27%, 74%)                  | 1.46 (0.74, 2.89)                      |                      |
| <b>Color-PPL Status in Field 7</b>                                                                      |             |                                 |                                        |                      |
| PPL Absent                                                                                              | 194         | 41% (33%, 50%)                  | --                                     | --                   |
| PPL Present                                                                                             | 16          | 66% (33%, 95%)                  | --                                     |                      |
| <b>Overall Cohort by FA-PPL</b>                                                                         |             |                                 |                                        |                      |
| <b>Primary: FA-PPL Status</b>                                                                           |             |                                 |                                        |                      |
| PPL Absent                                                                                              | 295         | 17% (13%, 23%)                  | --                                     | --                   |
| PPL Present                                                                                             | 247         | 18% (13%, 24%)                  | --                                     |                      |
| <b>By Baseline FA-PPL Characteristics <sup>c</sup><br/>(Moderately Severe to very Severe NPDR Only)</b> |             |                                 |                                        |                      |
| <b>Primary FA-PPL Status</b>                                                                            |             |                                 |                                        |                      |
| PPL Absent                                                                                              | 148         | 33% (25%, 44%)                  | - Reference -                          | .02                  |
| PPL Present                                                                                             | 74          | 65% (50%, 79%)                  | 1.75 (1.11, 2.76)                      |                      |
| <b>FA-PPL Status for H/Ma</b>                                                                           |             |                                 |                                        |                      |
| PPL Absent                                                                                              | 160         | 32% (24%, 42%)                  | - Reference -                          | <.001                |
| PPL Present                                                                                             | 62          | 72% (57%, 86%)                  | 2.23 (1.42, 3.52)                      |                      |
| <b>FA-PPL Status for IRMA</b>                                                                           |             |                                 |                                        |                      |
| PPL Absent                                                                                              | 190         | 40% (32%, 50%)                  | - Reference -                          | .15                  |
| PPL Present                                                                                             | 32          | 62% (41%, 82%)                  | 1.45 (0.88, 2.40)                      |                      |
| <b>FA-PPL Status for VB</b>                                                                             |             |                                 |                                        |                      |
| PPL Absent                                                                                              | 219         | 44% (36%, 52%)                  | --                                     | --                   |
| PPL Present                                                                                             | 3           | 0.0% (0.0%, 0.0%)               | --                                     |                      |
| <b>FA-PPL Status for NVE</b>                                                                            |             |                                 |                                        |                      |
| PPL Absent                                                                                              | 211         | 44% (36%, 52%)                  | --                                     | --                   |
| PPL Present                                                                                             | 11          | 39% (13%, 83%)                  | --                                     |                      |
| <b>Number of peripheral fields with FA-PPL</b>                                                          |             |                                 |                                        |                      |
| No PPL                                                                                                  | 148         | 33% (25%, 44%)                  | Per unit increase in number of fields: | <.001                |
| PPL in 1 Field                                                                                          | 32          | 42% (22%, 71%)                  | 1.26 (1.11, 1.44)                      |                      |
| PPL in ≥2 Fields                                                                                        | 42          | 78% (61%, 91%)                  |                                        |                      |
| <b>FA-PPL Status in Field 3</b>                                                                         |             |                                 |                                        |                      |
| PPL Absent                                                                                              | 191         | 38% (30%, 47%)                  | - Reference -                          | .004                 |
| PPL Present                                                                                             | 31          | 72% (53%, 88%)                  | 2.01 (1.25, 3.22)                      |                      |
| <b>FA-PPL Status in Field 4</b>                                                                         |             |                                 |                                        |                      |
| PPL Absent                                                                                              | 186         | 36% (28%, 45%)                  | - Reference -                          | <.001                |
| PPL Present                                                                                             | 36          | 79% (62%, 93%)                  | 2.90 (1.85, 4.56)                      |                      |
| <b>FA-PPL Status in Field 5</b>                                                                         |             |                                 |                                        |                      |
| PPL Absent                                                                                              | 195         | 36% (29%, 45%)                  | - Reference -                          | <.001                |
| PPL Present                                                                                             | 27          | 82% (62%, 95%)                  | 2.38 (1.50, 3.78)                      |                      |
| <b>FA-PPL Status in Field 6</b>                                                                         |             |                                 |                                        |                      |
| PPL Absent                                                                                              | 178         | 42% (34%, 51%)                  | - Reference -                          | .74                  |
| PPL Present                                                                                             | 44          | 57% (36%, 80%)                  | 1.10 (0.64, 1.87)                      |                      |
| <b>FA-PPL Status in Field 7</b>                                                                         |             |                                 |                                        |                      |
| PPL Absent                                                                                              | 194         | 39% (31%, 48%)                  | - Reference -                          | .007                 |
| PPL Present                                                                                             | 28          | 75% (52%, 93%)                  | 1.98 (1.20, 3.26)                      |                      |

<sup>a</sup> Eyes receiving treatment with anti-VEGF, steroid, or vitrectomy for any conditions (including DR or DME) were censored after treatment initiation. The Cox proportional hazards analysis was conducted only if there were at least 20 eyes in each stratum for the risk factor. *P* values for secondary PPL characteristics were only presented when *P* < 0.05 for primary PPL. The Cox proportional hazards model was adjusted for baseline ETDRS-DRSS level within the ETDRS fields on UWF-color images and the correlation between the two study eyes from the same participant. At 4 years, only 8% (25 of 314) of eyes experienced 2 or more step DRSS improvement from baseline without initiating any treatment (<1% in mild NPDR, 0 in moderate NPDR, 11% in moderately severe NPDR and 31% in severe and very severe NPDR).

<sup>b</sup> *P* value was reported only if the analysis of primary PPL showed a significant effect (i.e., *P* < 0.05).

<sup>c</sup> Due to significant interaction between DRSS level and PPL (*P* < .001) and the low outcome rates in the mild and moderate NPDR subgroups, the analyses were limited to eyes with moderate severe or severe and very severe NPDR

**eTable 14.** Exploratory Outcomes by Primary PPL Characteristics on UWF-Color and UWF-FA Images

| Outcomes                                                                                                                | No. of Eyes | Kaplan-Meier Estimates (95% CI) |
|-------------------------------------------------------------------------------------------------------------------------|-------------|---------------------------------|
| <b>By Baseline Primary Color-PPL</b>                                                                                    |             |                                 |
| <b>Worsening of 3 or more steps within the ETDRS fields on UWF-color images or receipt of DR treatment <sup>a</sup></b> |             |                                 |
| Color-PPL Absent                                                                                                        | 323         | 26% (21%, 32%)                  |
| Color-PPL Present                                                                                                       | 221         | 18% (13%, 25%)                  |
| <b>Worsening of 1 or more steps within the ETDRS fields on UWF-color images or receipt of DR treatment <sup>a</sup></b> |             |                                 |
| Color-PPL Absent                                                                                                        | 323         | 65% (59%, 71%)                  |
| Color-PPL Present                                                                                                       | 221         | 54% (47%, 61%)                  |
| <b>Receipt of DR treatment <sup>a</sup></b>                                                                             |             |                                 |
| Color-PPL Absent                                                                                                        | 323         | 12% (8.5%, 17%)                 |
| Color-PPL Present                                                                                                       | 221         | 9.0% (5.7%, 14%)                |
| <b>Development of vitreous hemorrhage within the ETDRS fields on UWF-color images or at clinical exam <sup>b</sup></b>  |             |                                 |
| Color-PPL Absent                                                                                                        | 323         | 3.2% (1.6%, 6.3%)               |
| Color-PPL Present                                                                                                       | 221         | 4.8% (2.5%, 9.0%)               |
| <b>Improvement of 3 or more steps within the ETDRS fields on UWF-color images <sup>b,c</sup></b>                        |             |                                 |
| Color-PPL Absent                                                                                                        | 240         | 13% (8.4%, 19%)                 |
| Color-PPL Present                                                                                                       | 132         | 10% (5.5%, 18%)                 |
| <b>Improvement of 1 or more steps within the ETDRS fields on UWF-color images <sup>b</sup></b>                          |             |                                 |
| Color-PPL Absent                                                                                                        | 323         | 49% (43%, 56%)                  |
| Color-PPL Present                                                                                                       | 221         | 42% (35%, 50%)                  |
| <b>By Baseline Primary FA-PPL</b>                                                                                       |             |                                 |
| <b>Worsening of 3 or more steps within the ETDRS fields on UWF-color images or receipt of DR treatment <sup>a</sup></b> |             |                                 |
| FA-PPL Absent                                                                                                           | 295         | 19% (14%, 25%)                  |
| FA-PPL Present                                                                                                          | 247         | 27% (21%, 33%)                  |
| <b>Worsening of 1 or more steps within the ETDRS fields on UWF-color images or receipt of DR treatment <sup>a</sup></b> |             |                                 |
| FA-PPL Absent                                                                                                           | 295         | 56% (50%, 63%)                  |
| FA-PPL Present                                                                                                          | 247         | 64% (58%, 71%)                  |
| <b>Receipt of DR treatment <sup>a</sup></b>                                                                             |             |                                 |
| FA-PPL Absent                                                                                                           | 295         | 11% (7.2%, 16%)                 |
| FA-PPL Present                                                                                                          | 247         | 11% (7.1%, 15%)                 |
| <b>Development of vitreous hemorrhage within the ETDRS fields on UWF-color images or at clinical exam <sup>b</sup></b>  |             |                                 |
| FA-PPL Absent                                                                                                           | 295         | 3.1% (1.5%, 6.5%)               |
| FA-PPL Present                                                                                                          | 247         | 4.6% (2.5%, 8.4%)               |
| <b>Improvement of 3 or more steps within the ETDRS fields on UWF-color images <sup>b,c</sup></b>                        |             |                                 |
| FA-PPL Absent                                                                                                           | 228         | 8.4% (4.8%, 14%)                |
| FA-PPL Present                                                                                                          | 143         | 16% (11%, 25%)                  |
| <b>Improvement of 1 or more steps within the ETDRS fields on UWF-color images <sup>b</sup></b>                          |             |                                 |
| FA-PPL Absent                                                                                                           | 295         | 50% (43%, 57%)                  |
| FA-PPL Present                                                                                                          | 247         | 41% (35%, 49%)                  |

<sup>a</sup> Eyes receiving treatment with anti-VEGF, steroid, or vitrectomy for conditions other than DR were censored after treatment initiation.

<sup>b</sup> Eyes receiving treatment with anti-VEGF, steroid, or vitrectomy for any conditions (including DR or DME) were censored after treatment initiation.

<sup>c</sup> Excluding eyes with mild NPDR (Level 35) at baseline because they cannot improve 3 steps.
